# Supplementary material for: pH-Dependence of the Aqueous Phase Room Temperature Brønsted Acid-Catalyzed Chemoselective Oxidation of Sulfides with H2O2
Source: MDPI journal article supplement (doi:10.3390/molecules200916709), 2015-09-14
Supplement: s1 [file s1]

# Supplementary Materials

## 1. Experimental Data

**Table S1.** Effect of the substrate amount on the oxidation of methyl phenyl sulfide with H<sub>2</sub>O<sub>2</sub> catalyzed by camphor-10-sulfonic acid <sup>a</sup>.

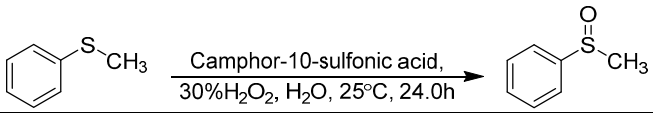

| Entry | Substrate Concentration (mmol/mL) | Conversion (%) <sup>b</sup> | Yield (%) <sup>b</sup> |
|-------|-----------------------------------|-----------------------------|------------------------|
| 1     | 0.5                               | 99.6                        | 99.3                   |
| 2     | 1.0                               | 99.8                        | 99.0                   |
| 3     | 2.0                               | 99.7                        | 97.7                   |
| 4     | 3.0                               | 99.7                        | 97.8                   |
| 5     | 4.0                               | 99.9                        | 97.5                   |
| 6     | 5.0                               | 99.9                        | 98.3                   |

<sup>a</sup> Reaction conditions: catalyst camphor-10-sulfonic acid (0.25 mmol, 58.1 mg), 30% H<sub>2</sub>O<sub>2</sub> (1.15 equ.), solvent (2.0 mL H<sub>2</sub>O), 25 °C, 24.0 h; <sup>b</sup> Conversion and selectivity were determined by GC with *p*-xylene as internal standard, product was determined by comparison with the authentic sample.

**Table S2.** Effect of the substrate amount on the oxidation of methyl phenyl sulfide with H<sub>2</sub>O<sub>2</sub> catalyzed by camphor-10-sulfonic acid <sup>a</sup>.

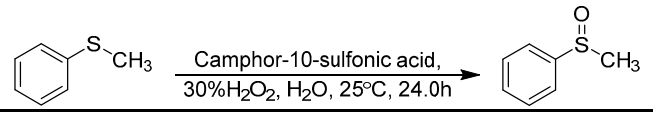

| Entry | Substrate Concentration (mmol/mL) | Conversion (%) <sup>b</sup> | Yield (%) <sup>b</sup> |
|-------|-----------------------------------|-----------------------------|------------------------|
| 1     | 0.5                               | 39.8                        | 39.8                   |
| 2     | 0.4                               | 38.6                        | 38.6                   |
| 3     | 0.3                               | 43.6                        | 43.6                   |
| 4     | 0.2                               | 46.4                        | 46.4                   |

<sup>a</sup> Reaction conditions: catalyst camphor-10-sulfonic acid (0.025 mmol, 5.8 mg), 30% H<sub>2</sub>O<sub>2</sub> (1.15 equ.), solvent (2.0 mL H<sub>2</sub>O), 25 °C, 24.0 h; <sup>b</sup> Conversion and selectivity were determined by GC with *p*-xylene as internal standard, product was determined by comparison with the authentic sample.

**Table S3.** Effect of the substrate amount on the oxidation of methyl phenyl sulfide with H<sub>2</sub>O<sub>2</sub> catalyzed by camphor-10-sulfonic acid in pH 1.30 <sup>a</sup>.

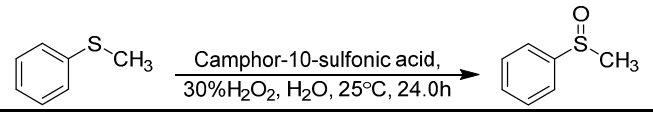

| Entry | Substrate Concentration (mmol/mL) | Conversion (%) <sup>b</sup> | Yield (%) <sup>b</sup> |
|-------|-----------------------------------|-----------------------------|------------------------|
| 1     | 0.5                               | 99.8                        | 98.3                   |
| 2     | 1.0                               | 99.7                        | 98.0                   |
| 3     | 2.0                               | 99.7                        | 97.0                   |
| 4     | 3.0                               | 99.8                        | 97.4                   |
| 5     | 4.0                               | 99.8                        | 97.4                   |
| 6     | 5.0                               | 99.9                        | 97.6                   |

<sup>a</sup> Reaction conditions: 30% H<sub>2</sub>O<sub>2</sub> (1.15 equ.), catalyst and solvent (2.0 mL pH 1.30 aqueous solution of camphor-10-sulfonic acid), 25 °C, 24.0 h; <sup>b</sup> Conversion and selectivity were determined by GC with *p*-xylene as internal standard, product was determined by comparison with the authentic sample.

**Table S4.** Effect of catalyst loading on the oxidation of methyl phenyl sulfide with H<sub>2</sub>O<sub>2</sub> catalyzed by methanesulfonic acid <sup>a</sup>.

| Entry     | Catalyst Loading (%) | Conversion (%) <sup>b</sup> | Yield (%) <sup>b</sup> |
|-----------|----------------------|-----------------------------|------------------------|
| 1         | 0.0                  | 36.5                        | 36.5                   |
| 2         | 2.5                  | 39.0                        | 39.0                   |
| 3         | 5.0                  | 48.9                        | 48.9                   |
| 4         | 7.5                  | 53.8                        | 53.6                   |
| 5         | 10.0                 | 66.0                        | 65.6                   |
| 6         | 12.5                 | 68.2                        | 67.8                   |
| 7         | 15.0                 | 77.6                        | 77.1                   |
| 8         | 17.5                 | 84.3                        | 83.7                   |
| 9         | 20.0                 | 90.0                        | 89.2                   |
| 10        | 22.5                 | 97.4                        | 96.6                   |
| <b>11</b> | <b>25.0</b>          | <b>99.1</b>                 | <b>98.5</b>            |

<sup>a</sup> Reaction conditions: substrate (1.0 mmol, 124.2 mg), 30% H<sub>2</sub>O<sub>2</sub> (1.15 mmol, 130  $\mu$ L), solvent (2.0 mL H<sub>2</sub>O), 25 °C, 24.0 h; <sup>b</sup> Conversion and selectivity were determined by GC with *p*-xylene as internal standard, product was determined by comparison with the authentic sample.

**Table S5.** Effect of the substrate amount on the oxidation of methyl phenyl sulfide with H<sub>2</sub>O<sub>2</sub> catalyzed by methanesulfonic acid <sup>a</sup>.

| Entry | Substrate Concentration (mmol/mL) | Conversion (%) <sup>b</sup> | Yield (%) <sup>b</sup> |
|-------|-----------------------------------|-----------------------------|------------------------|
| 1     | 0.5                               | 99.7                        | 98.8                   |
| 2     | 1.0                               | 99.8                        | 98.4                   |
| 3     | 2.0                               | 99.9                        | 98.0                   |
| 4     | 3.0                               | 99.8                        | 97.7                   |
| 5     | 4.0                               | 99.9                        | 97.5                   |
| 6     | 5.0                               | 99.9                        | 97.7                   |

<sup>a</sup> Reaction conditions: catalyst methanesulfonic acid (0.25 mmol, 24.0 mg), 30% H<sub>2</sub>O<sub>2</sub> (1.15 equ.), solvent (2.0 mL H<sub>2</sub>O), 25 °C, 24.0 h; <sup>b</sup> Conversion and selectivity were determined by GC with *p*-xylene as internal standard, product was determined by comparison with the authentic sample.

**Table S6.** Effect of the substrate amount on the oxidation of methyl phenyl sulfide with H<sub>2</sub>O<sub>2</sub> catalyzed by methanesulfonic acid <sup>a</sup>.

| Entry | Substrate Concentration (mmol/mL) | Conversion (%) <sup>b</sup> | Yield (%) <sup>b</sup> |
|-------|-----------------------------------|-----------------------------|------------------------|
| 1     | 0.5                               | 42.3                        | 42.3                   |
| 2     | 0.4                               | 46.0                        | 46.0                   |
| 3     | 0.3                               | 46.4                        | 46.4                   |
| 4     | 0.2                               | 51.6                        | 51.6                   |

<sup>a</sup> Reaction conditions: catalyst methanesulfonic acid (0.025 mmol, 2.4 mg), 30% H<sub>2</sub>O<sub>2</sub> (1.15 equ.), solvent (2.0 mL H<sub>2</sub>O), 25 °C, 24.0 h; <sup>b</sup> Conversion and selectivity were determined by GC with *p*-xylene as internal standard, product was determined by comparison with the authentic sample.

**Table S7.** Effect of catalyst loading on the oxidation of methyl phenyl sulfide with H<sub>2</sub>O<sub>2</sub> catalyzed by *p*-toluenesulfonic acid <sup>a</sup>.

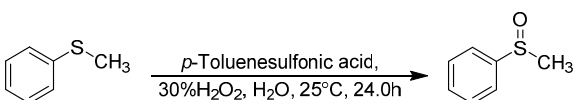

| Entry     | Catalyst Loading (%) | Conversion (%) <sup>b</sup> | Yield (%) <sup>b</sup> |
|-----------|----------------------|-----------------------------|------------------------|
| 1         | 0.0                  | 39.1                        | 39.1                   |
| 2         | 2.5                  | 45.8                        | 45.8                   |
| 3         | 5.0                  | 47.8                        | 47.8                   |
| 4         | 7.5                  | 57.2                        | 56.9                   |
| 5         | 10.0                 | 64.4                        | 64.1                   |
| 6         | 12.5                 | 75.5                        | 75.1                   |
| 7         | 15.0                 | 82.5                        | 82.0                   |
| 8         | 17.5                 | 88.2                        | 87.6                   |
| 9         | 20.0                 | 96.1                        | 95.5                   |
| 10        | 22.5                 | 99.4                        | 98.6                   |
| <b>11</b> | <b>25.0</b>          | <b>99.7</b>                 | <b>98.8</b>            |

<sup>a</sup> Reaction conditions: substrate (1.0 mmol, 124.2 mg), 30% H<sub>2</sub>O<sub>2</sub> (1.15 mmol, 130  $\mu$ L), solvent (2.0 mL H<sub>2</sub>O), 25 °C, 24.0 h; <sup>b</sup> Conversion and selectivity were determined by GC with *p*-xylene as internal standard, product was determined by comparison with the authentic sample.

**Table S8.** Effect of the substrate amount on the oxidation of methyl phenyl sulfide with H<sub>2</sub>O<sub>2</sub> catalyzed by *p*-toluenesulfonic acid <sup>a</sup>.

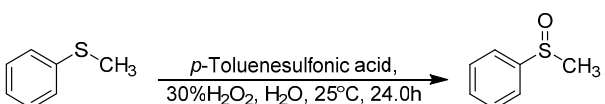

| Entry | Substrate Concentration (mmol/mL) | Conversion (%) <sup>b</sup> | Yield (%) <sup>b</sup> |
|-------|-----------------------------------|-----------------------------|------------------------|
| 1     | 0.5                               | 99.7                        | 98.8                   |
| 2     | 1.0                               | 99.8                        | 98.5                   |
| 3     | 2.0                               | 99.9                        | 98.1                   |
| 4     | 3.0                               | 99.9                        | 97.9                   |
| 5     | 4.0                               | 99.9                        | 98.1                   |
| 6     | 5.0                               | 99.9                        | 98.1                   |

<sup>a</sup> Reaction conditions: catalyst *p*-toluenesulfonic acid (0.25 mmol, 43.1 mg), 30% H<sub>2</sub>O<sub>2</sub> (1.15 equ.), solvent (2.0 mL H<sub>2</sub>O), 25 °C, 24.0 h; <sup>b</sup> Conversion and selectivity were determined by GC with *p*-xylene as internal standard, product was determined by comparison with the authentic sample.

**Table S9.** Effect of the substrate amount on the oxidation of methyl phenyl sulfide with H<sub>2</sub>O<sub>2</sub> catalyzed by *p*-toluenesulfonic acid <sup>a</sup>.

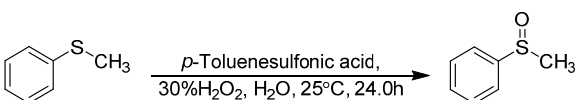

| Entry | Substrate Concentration (mmol/mL) | Conversion (%) <sup>b</sup> | Yield (%) <sup>b</sup> |
|-------|-----------------------------------|-----------------------------|------------------------|
| 1     | 0.5                               | 45.9                        | 45.9                   |
| 2     | 0.4                               | 44.4                        | 44.4                   |
| 3     | 0.3                               | 51.9                        | 51.9                   |
| 4     | 0.2                               | 53.4                        | 53.4                   |

<sup>a</sup> Reaction conditions: catalyst *p*-toluenesulfonic acid (0.025 mmol, 4.3 mg), 30% H<sub>2</sub>O<sub>2</sub> (1.15 equ.), solvent (2.0 mL H<sub>2</sub>O), 25 °C, 24.0 h. <sup>b</sup> Conversion and selectivity were determined by GC with *p*-xylene as internal standard, product was determined by comparison with the authentic sample.

**Table S10.** Effect of catalyst loading on the oxidation of methyl phenyl sulfide with H<sub>2</sub>O<sub>2</sub> catalyzed by methanoic acid <sup>a</sup>.

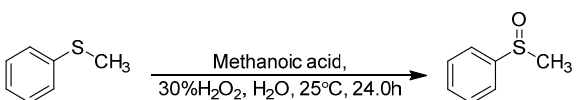

| Entry    | Catalyst Loading (%) | Conversion (%) <sup>b</sup> | Yield (%) <sup>b</sup> |
|----------|----------------------|-----------------------------|------------------------|
| 1        | 0.0                  | 39.1                        | 39.1                   |
| 2        | 100.0                | 58.7                        | 58.5                   |
| 3        | 150.0                | 63.4                        | 63.2                   |
| 4        | 200.0                | 79.3                        | 78.9                   |
| 5        | 250.0                | 85.8                        | 85.4                   |
| 6        | 300.0                | 89.8                        | 89.4                   |
| 7        | 350.0                | 97.3                        | 96.8                   |
| <b>8</b> | <b>400.0</b>         | <b>99.1</b>                 | <b>98.6</b>            |
| 9        | 450.0                | 99.3                        | 97.4                   |
| 10       | 500.0                | 99.3                        | 95.9                   |

<sup>a</sup> Reaction conditions: substrate (1.0 mmol, 124.2 mg), 30% H<sub>2</sub>O<sub>2</sub> (1.15 mmol, 130  $\mu$ L), solvent (2.0 mL H<sub>2</sub>O), 25 °C, 24.0 h; <sup>b</sup> Conversion and selectivity were determined by GC with *p*-xylene as internal standard, product was determined by comparison with the authentic sample.

**Table S11.** Effect of the substrate amount on the oxidation of methyl phenyl sulfide with H<sub>2</sub>O<sub>2</sub> catalyzed by methanoic acid <sup>a</sup>.

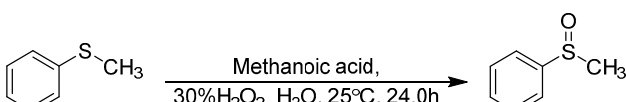

| Entry | Substrate Concentration (mmol/mL) | Conversion (%) <sup>b</sup> | Yield (%) <sup>b</sup> |
|-------|-----------------------------------|-----------------------------|------------------------|
| 1     | 0.50                              | 99.4                        | 98.1                   |
| 2     | 0.75                              | 99.6                        | 98.0                   |
| 3     | 1.00                              | 99.6                        | 98.3                   |
| 4     | 1.25                              | 99.7                        | 98.3                   |
| 5     | 1.50                              | 99.7                        | 98.1                   |
| 6     | 1.75                              | 99.8                        | 97.9                   |
| 7     | 2.00                              | 99.8                        | 98.5                   |

<sup>a</sup> Reaction conditions: catalyst methanoic acid (4.00 mmol, 184.1 mg), 30% H<sub>2</sub>O<sub>2</sub> (1.15 equ.), solvent (2.0 mL H<sub>2</sub>O), 25 °C, 24.0 h; <sup>b</sup> Conversion and selectivity were determined by GC with *p*-xylene as internal standard, product was determined by comparison with the authentic sample.

**Table S12.** Effect of the substrate amount on the oxidation of methyl phenyl sulfide with H<sub>2</sub>O<sub>2</sub> catalyzed by methanoic acid <sup>a</sup>.

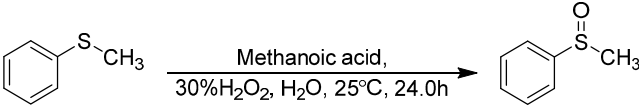

| Entry | Substrate Concentration (mmol/mL) | Conversion (%) <sup>b</sup> | Yield (%) <sup>b</sup> |
|-------|-----------------------------------|-----------------------------|------------------------|
| 1     | 0.5                               | 41.9                        | 41.9                   |
| 2     | 0.4                               | 39.4                        | 39.4                   |
| 3     | 0.3                               | 46.9                        | 46.9                   |
| 4     | 0.2                               | 48.4                        | 48.4                   |

<sup>a</sup> Reaction conditions: catalyst methanoic acid (1.00 mmol, 46.0 mg), 30% H<sub>2</sub>O<sub>2</sub> (1.15 equ.), solvent (2.0 mL H<sub>2</sub>O), 25 °C, 24.0 h; <sup>b</sup> Conversion and selectivity were determined by GC with *p*-xylene as internal standard, product was determined by comparison with the authentic sample.

**Table S13.** Effect of catalyst loading on the oxidation of methyl phenyl sulfide with H<sub>2</sub>O<sub>2</sub> catalyzed by acetic acid <sup>a</sup>.

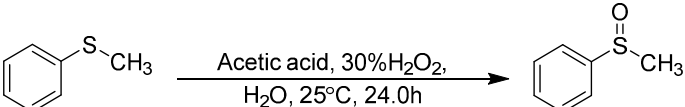

| Entry     | Catalyst Loading (%) | Conversion (%) <sup>b</sup> | Yield (%) <sup>b</sup> |
|-----------|----------------------|-----------------------------|------------------------|
| 1         | 0.0                  | 41.5                        | 41.5                   |
| 2         | 100.0                | 54.9                        | 54.7                   |
| 3         | 150.0                | 61.9                        | 61.8                   |
| 4         | 200.0                | 66.8                        | 66.7                   |
| 5         | 250.0                | 70.8                        | 70.7                   |
| 6         | 300.0                | 75.2                        | 75.0                   |
| 7         | 350.0                | 86.8                        | 86.6                   |
| 8         | 400.0                | 93.8                        | 93.6                   |
| 9         | 450.0                | 95.3                        | 95.1                   |
| 10        | 500.0                | 96.6                        | 96.4                   |
| <b>11</b> | <b>550.0</b>         | <b>99.1</b>                 | <b>98.9</b>            |
| 12        | 600.0                | 99.1                        | 98.9                   |

<sup>a</sup> Reaction conditions: substrate (1.0 mmol, 124.2 mg), 30% H<sub>2</sub>O<sub>2</sub> (1.15 mmol, 130 μL), solvent (2.0 mL H<sub>2</sub>O), 25 °C, 24.0 h; <sup>b</sup> Conversion and selectivity were determined by GC with *p*-xylene as internal standard, product was determined by comparison with the authentic sample.

**Table S14.** Effect of the substrate amount on the oxidation of methyl phenyl sulfide with H<sub>2</sub>O<sub>2</sub> catalyzed by acetic acid <sup>a</sup>.

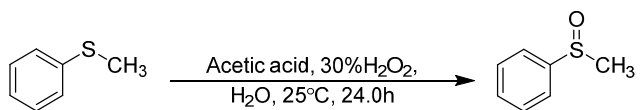

| Entry | Substrate Concentration (mmol/mL) | Conversion (%) <sup>b</sup> | Yield (%) <sup>b</sup> |
|-------|-----------------------------------|-----------------------------|------------------------|
| 1     | 0.50                              | 99.2                        | 98.9                   |
| 2     | 0.75                              | 98.6                        | 98.3                   |
| 3     | 1.00                              | 98.5                        | 98.1                   |
| 4     | 1.25                              | 99.3                        | 98.9                   |
| 5     | 1.50                              | 99.5                        | 99.0                   |
| 6     | 1.75                              | 99.7                        | 99.1                   |
| 7     | 2.00                              | 99.6                        | 99.0                   |
| 8     | 2.25                              | 99.6                        | 98.8                   |
| 9     | 2.50                              | 99.1                        | 98.5                   |
| 10    | 2.75                              | 98.9                        | 98.1                   |
| 11    | 3.00                              | 99.1                        | 97.8                   |

<sup>a</sup> Reaction conditions: catalyst acetic acid (5.50 mmol, 330.0 mg), 30% H<sub>2</sub>O<sub>2</sub> (1.15 equ.), solvent (2.0 mL H<sub>2</sub>O), 25 °C, 24.0 h; <sup>b</sup> Conversion and selectivity were determined by GC with *p*-xylene as internal standard, product was determined by comparison with the authentic sample.

**Table S15.** Effect of the substrate amount on the oxidation of methyl phenyl sulfide with H<sub>2</sub>O<sub>2</sub> catalyzed by acetic acid <sup>a</sup>.

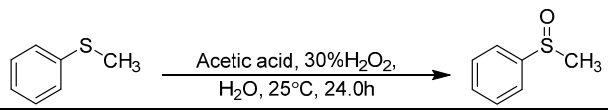

| Entry | Substrate Concentration (mmol/mL) | Conversion (%) <sup>b</sup> | Yield (%) <sup>b</sup> |
|-------|-----------------------------------|-----------------------------|------------------------|
| 1     | 0.5                               | 46.8                        | 46.8                   |
| 2     | 0.4                               | 47.2                        | 47.2                   |
| 3     | 0.3                               | 47.6                        | 47.6                   |
| 4     | 0.2                               | 58.1                        | 58.1                   |

<sup>a</sup> Reaction conditions: catalyst acetic acid (1.00 mmol, 60.1 mg), 30% H<sub>2</sub>O<sub>2</sub> (1.15 equ.), solvent (2.0 mL H<sub>2</sub>O), 25 °C, 24.0 h; <sup>b</sup> Conversion and selectivity were determined by GC with *p*-xylene as internal standard, product was determined by comparison with the authentic sample.

**Table S16.** Effect of pH value on the oxidation of methyl phenyl sulfide with H<sub>2</sub>O<sub>2</sub> catalyzed by methanesulfonic acid <sup>a</sup>.

| <chem>CSC1=CC=CC=C1</chem> $\xrightarrow[30\% \text{H}_2\text{O}_2, \text{H}_2\text{O}, 25^\circ\text{C}, 24.0\text{h}]{\text{Methanesulfonic acid,}}$ <chem>CS(=O)(=O)C1=CC=CC=C1</chem> |             |                             |                        |
|-------------------------------------------------------------------------------------------------------------------------------------------------------------------------------------------|-------------|-----------------------------|------------------------|
| Entry                                                                                                                                                                                     | pH Value    | Conversion (%) <sup>b</sup> | Yield (%) <sup>b</sup> |
| 1                                                                                                                                                                                         | 2.00        | 43.7                        | 43.6                   |
| 2                                                                                                                                                                                         | 1.90        | 49.8                        | 49.6                   |
| 3                                                                                                                                                                                         | 1.80        | 57.9                        | 57.6                   |
| 4                                                                                                                                                                                         | 1.70        | 67.5                        | 67.2                   |
| 5                                                                                                                                                                                         | 1.60        | 72.7                        | 72.3                   |
| 6                                                                                                                                                                                         | 1.50        | 78.2                        | 77.4                   |
| 7                                                                                                                                                                                         | 1.40        | 98.0                        | 97.2                   |
| <b>8</b>                                                                                                                                                                                  | <b>1.30</b> | <b>99.8</b>                 | <b>98.7</b>            |
| 9                                                                                                                                                                                         | 1.20        | 99.7                        | 98.4                   |
| 10                                                                                                                                                                                        | 1.10        | 99.5                        | 97.9                   |
| 11                                                                                                                                                                                        | 1.00        | 99.3                        | 96.4                   |

<sup>a</sup> Reaction conditions: substrate (1.0 mmol, 124.2 mg), 30% H<sub>2</sub>O<sub>2</sub> (1.15 mmol, 130  $\mu$ L), catalyst and solvent (2.0 mL aqueous solution of methanesulfonic acid), 25  $^\circ$ C, 24.0 h; <sup>b</sup> Conversion and selectivity were determined by GC with *p*-xylene as internal standard, product was determined by comparison with the authentic sample.

**Table S17.** Effect of pH value on the oxidation of methyl phenyl sulfide with H<sub>2</sub>O<sub>2</sub> catalyzed by *p*-toluenesulfonic acid <sup>a</sup>.

| <chem>CSC1=CC=CC=C1</chem> $\xrightarrow[30\% \text{H}_2\text{O}_2, \text{H}_2\text{O}, 25^\circ\text{C}, 24.0\text{h}]{p\text{-Toluenesulfonic acid,}}$ <chem>CS(=O)(=O)C1=CC=CC=C1</chem> |             |                             |                        |
|---------------------------------------------------------------------------------------------------------------------------------------------------------------------------------------------|-------------|-----------------------------|------------------------|
| Entry                                                                                                                                                                                       | pH Value    | Conversion (%) <sup>b</sup> | Yield (%) <sup>b</sup> |
| 1                                                                                                                                                                                           | 2.00        | 53.7                        | 53.5                   |
| 2                                                                                                                                                                                           | 1.90        | 55.8                        | 55.6                   |
| 3                                                                                                                                                                                           | 1.80        | 57.5                        | 57.2                   |
| 4                                                                                                                                                                                           | 1.70        | 67.0                        | 66.6                   |
| 5                                                                                                                                                                                           | 1.60        | 75.5                        | 75.0                   |
| 6                                                                                                                                                                                           | 1.50        | 85.6                        | 85.0                   |
| 7                                                                                                                                                                                           | 1.40        | 96.8                        | 96.0                   |
| <b>8</b>                                                                                                                                                                                    | <b>1.30</b> | <b>99.7</b>                 | <b>98.5</b>            |
| 9                                                                                                                                                                                           | 1.20        | 99.8                        | 98.2                   |
| 10                                                                                                                                                                                          | 1.10        | 99.6                        | 96.8                   |
| 11                                                                                                                                                                                          | 1.00        | 99.5                        | 93.9                   |

<sup>a</sup> Reaction conditions: substrate (1.0 mmol, 124.2 mg), 30% H<sub>2</sub>O<sub>2</sub> (1.15 mmol, 130  $\mu$ L), catalyst and solvent (2.0 mL aqueous solution of *p*-toluenesulfonic acid), 25  $^\circ$ C, 24.0 h; <sup>b</sup> Conversion and selectivity were determined by GC with *p*-xylene as internal standard, product was determined by comparison with the authentic sample.

**Table S18.** Effect of pH value on the oxidation of methyl phenyl sulfide with H<sub>2</sub>O<sub>2</sub> catalyzed by methanoic acid <sup>a</sup>.

| 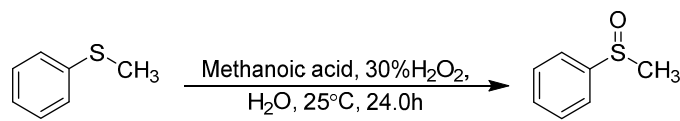 |             |                             |                        |
|------------------------------------------------------------------------------------|-------------|-----------------------------|------------------------|
| Entry                                                                              | pH Value    | Conversion (%) <sup>b</sup> | Yield (%) <sup>b</sup> |
| 1                                                                                  | 2.00        | 49.3                        | 49.1                   |
| 2                                                                                  | 1.90        | 50.3                        | 50.2                   |
| 3                                                                                  | 1.80        | 53.8                        | 53.3                   |
| 4                                                                                  | 1.70        | 57.1                        | 56.6                   |
| 5                                                                                  | 1.60        | 71.3                        | 70.8                   |
| 6                                                                                  | 1.50        | 74.9                        | 74.3                   |
| 7                                                                                  | 1.40        | 98.4                        | 97.9                   |
| <b>8</b>                                                                           | <b>1.30</b> | <b>99.6</b>                 | <b>99.1</b>            |
| 9                                                                                  | 1.20        | 99.6                        | 98.7                   |
| 10                                                                                 | 1.10        | 99.8                        | 98.1                   |
| 11                                                                                 | 1.00        | 99.2                        | 97.3                   |

<sup>a</sup> Reaction conditions: substrate (1.0 mmol, 124.2 mg), 30% H<sub>2</sub>O<sub>2</sub> (1.15 mmol, 130  $\mu$ L), catalyst and solvent (2.0 mL aqueous solution of methanoic acid), 25 °C, 24.0 h; <sup>b</sup> Conversion and selectivity were determined by GC with *p*-xylene as internal standard, product was determined by comparison with the authentic sample.

**Table S19.** Effect of pH value on the oxidation of methyl phenyl sulfide with H<sub>2</sub>O<sub>2</sub> catalyzed by sulfuric acid <sup>a</sup>.

| 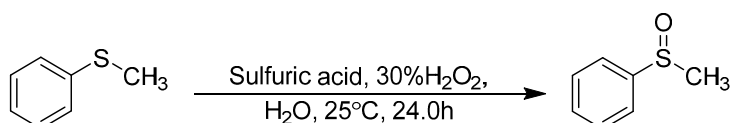 |             |                             |                        |
|--------------------------------------------------------------------------------------|-------------|-----------------------------|------------------------|
| Entry                                                                                | pH Value    | Conversion (%) <sup>b</sup> | Yield (%) <sup>b</sup> |
| 1                                                                                    | 2.00        | 52.5                        | 52.2                   |
| 2                                                                                    | 1.90        | 53.5                        | 53.3                   |
| 3                                                                                    | 1.80        | 56.9                        | 56.7                   |
| 4                                                                                    | 1.70        | 59.1                        | 58.8                   |
| 5                                                                                    | 1.60        | 73.3                        | 72.8                   |
| 6                                                                                    | 1.50        | 76.1                        | 75.6                   |
| 7                                                                                    | 1.40        | 98.5                        | 97.9                   |
| <b>8</b>                                                                             | <b>1.30</b> | <b>99.7</b>                 | <b>98.6</b>            |
| 9                                                                                    | 1.20        | 99.6                        | 97.8                   |
| 10                                                                                   | 1.10        | 99.7                        | 98.2                   |
| 11                                                                                   | 1.00        | 99.2                        | 97.1                   |

<sup>a</sup> Reaction conditions: substrate (1.0 mmol, 124.2 mg), 30% H<sub>2</sub>O<sub>2</sub> (1.15 mmol, 130  $\mu$ L), catalyst and solvent (2.0 mL aqueous solution of sulfuric acid), 25 °C, 24.0 h; <sup>b</sup> Conversion and selectivity were determined by GC with *p*-xylene as internal standard, product was determined by comparison with the authentic sample.



**Table S20.** Effect of pH value on the oxidation of methyl phenyl sulfide with H<sub>2</sub>O<sub>2</sub> catalyzed by hydrochloric acid <sup>a</sup>.

| <chem>CS(=O)c1ccccc1</chem> $\xrightarrow[\text{H}_2\text{O}, 25^\circ\text{C}, 24.0\text{h}]{\text{Hydrochloric acid, 30\%H}_2\text{O}_2}$ <chem>CS(=O)c1ccccc1</chem> |             |                             |                        |
|-------------------------------------------------------------------------------------------------------------------------------------------------------------------------|-------------|-----------------------------|------------------------|
| Entry                                                                                                                                                                   | pH Value    | Conversion (%) <sup>b</sup> | Yield (%) <sup>b</sup> |
| 1                                                                                                                                                                       | 2.00        | 48.1                        | 47.9                   |
| 2                                                                                                                                                                       | 1.90        | 52.8                        | 52.6                   |
| 3                                                                                                                                                                       | 1.80        | 61.5                        | 61.1                   |
| 4                                                                                                                                                                       | 1.70        | 64.5                        | 64.1                   |
| 5                                                                                                                                                                       | 1.60        | 68.3                        | 68.0                   |
| 6                                                                                                                                                                       | 1.50        | 88.9                        | 88.0                   |
| 7                                                                                                                                                                       | 1.40        | 99.2                        | 98.3                   |
| <b>8</b>                                                                                                                                                                | <b>1.30</b> | <b>99.7</b>                 | <b>98.8</b>            |
| 9                                                                                                                                                                       | 1.20        | 99.6                        | 98.4                   |
| 10                                                                                                                                                                      | 1.10        | 99.3                        | 97.1                   |
| 11                                                                                                                                                                      | 1.00        | 99.3                        | 97.3                   |

<sup>a</sup> Reaction conditions: substrate (1.0 mmol, 124.2 mg), 30% H<sub>2</sub>O<sub>2</sub> (1.15 mmol, 130  $\mu$ L), catalyst and solvent (2.0 mL aqueous solution of hydrochloric acid), 25  $^\circ$ C, 24.0 h; <sup>b</sup> Conversion and selectivity were determined by GC with *p*-xylene as internal standard, product was determined by comparison with the authentic sample.

**Table S21.** Effect of pH value on the oxidation of methyl phenyl sulfide with H<sub>2</sub>O<sub>2</sub> catalyzed by trifluoroacetic acid <sup>a</sup>.

| <chem>CS(=O)c1ccccc1</chem> $\xrightarrow[\text{H}_2\text{O}, 25^\circ\text{C}, 24.0\text{h}]{\text{Trifluoroacetic acid, 30\%H}_2\text{O}_2}$ <chem>CS(=O)c1ccccc1</chem> |             |                             |                        |
|----------------------------------------------------------------------------------------------------------------------------------------------------------------------------|-------------|-----------------------------|------------------------|
| Entry                                                                                                                                                                      | pH Value    | Conversion (%) <sup>b</sup> | Yield (%) <sup>b</sup> |
| 1                                                                                                                                                                          | 2.00        | 52.9                        | 52.7                   |
| 2                                                                                                                                                                          | 1.90        | 60.8                        | 60.6                   |
| 3                                                                                                                                                                          | 1.80        | 66.1                        | 65.8                   |
| 4                                                                                                                                                                          | 1.70        | 66.2                        | 65.9                   |
| 5                                                                                                                                                                          | 1.60        | 78.0                        | 77.5                   |
| 6                                                                                                                                                                          | 1.50        | 89.0                        | 88.2                   |
| 7                                                                                                                                                                          | 1.40        | 97.7                        | 96.6                   |
| <b>8</b>                                                                                                                                                                   | <b>1.30</b> | <b>98.8</b>                 | <b>97.7</b>            |
| 9                                                                                                                                                                          | 1.20        | 99.0                        | 96.4                   |
| 10                                                                                                                                                                         | 1.10        | 95.1                        | 92.0                   |
| 11                                                                                                                                                                         | 1.00        | 95.1                        | 85.3                   |

<sup>a</sup> Reaction conditions: substrate (1.0 mmol, 124.2 mg), 30% H<sub>2</sub>O<sub>2</sub> (1.15 mmol, 130  $\mu$ L), catalyst and solvent (2.0 mL aqueous solution of trifluoroacetic acid), 25  $^\circ$ C, 24.0 h; <sup>b</sup> Conversion and selectivity were determined by GC with *p*-xylene as internal standard, product was determined by comparison with the authentic sample.

2.  $^1\text{H}$ -NMR Spectra of Product Sulfoxides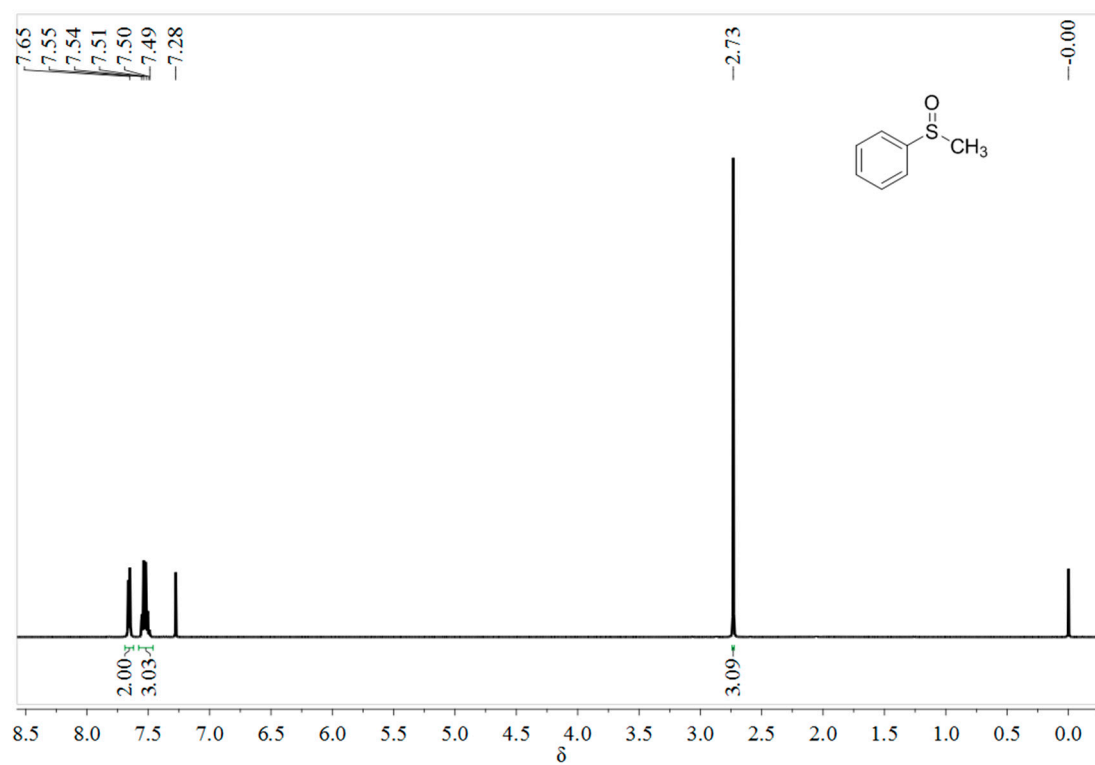Figure S1.  $^1\text{H}$ -NMR spectrum of methyl phenyl sulfoxide.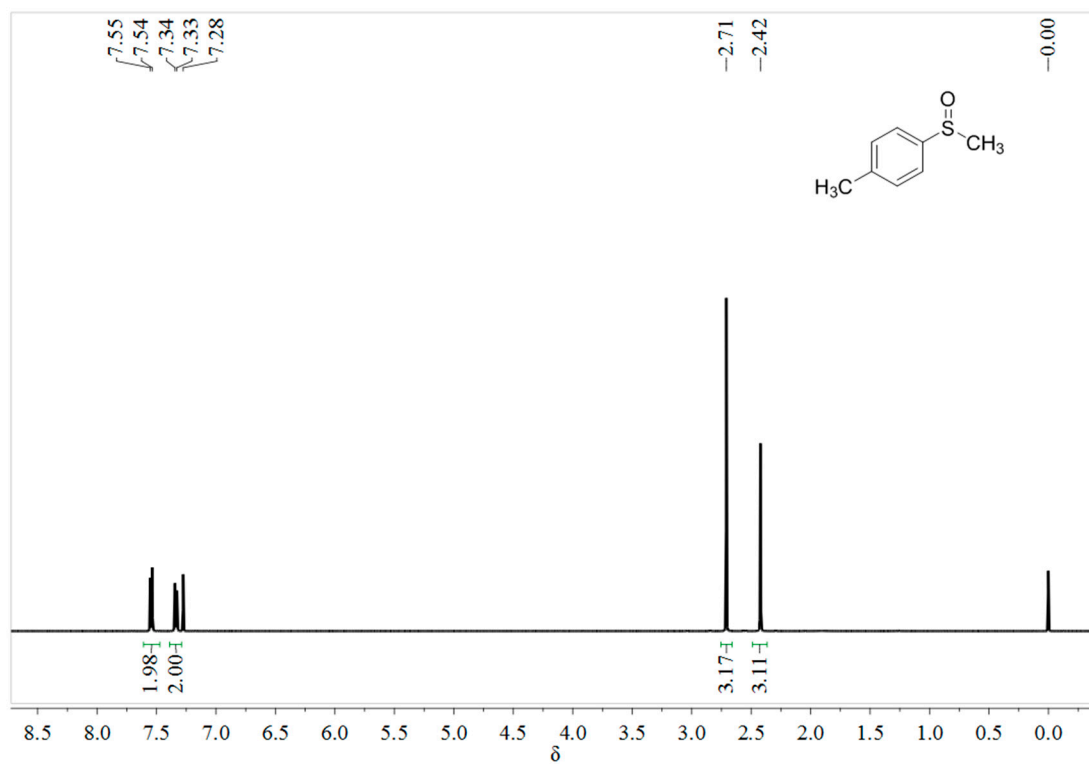Figure S2.  $^1\text{H}$ -NMR spectrum of methyl (4-methylphenyl) sulfoxide.

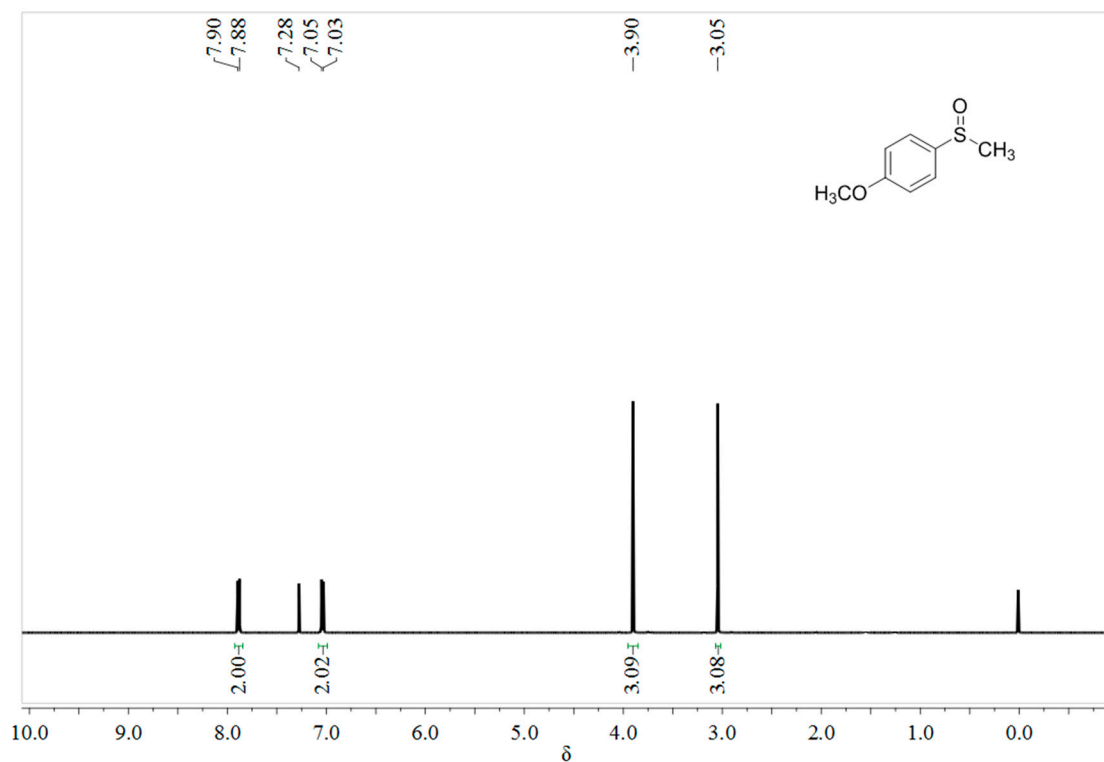

**Figure S3.** <sup>1</sup>H-NMR spectrum of methyl (4-methoxyphenyl) sulfoxide.

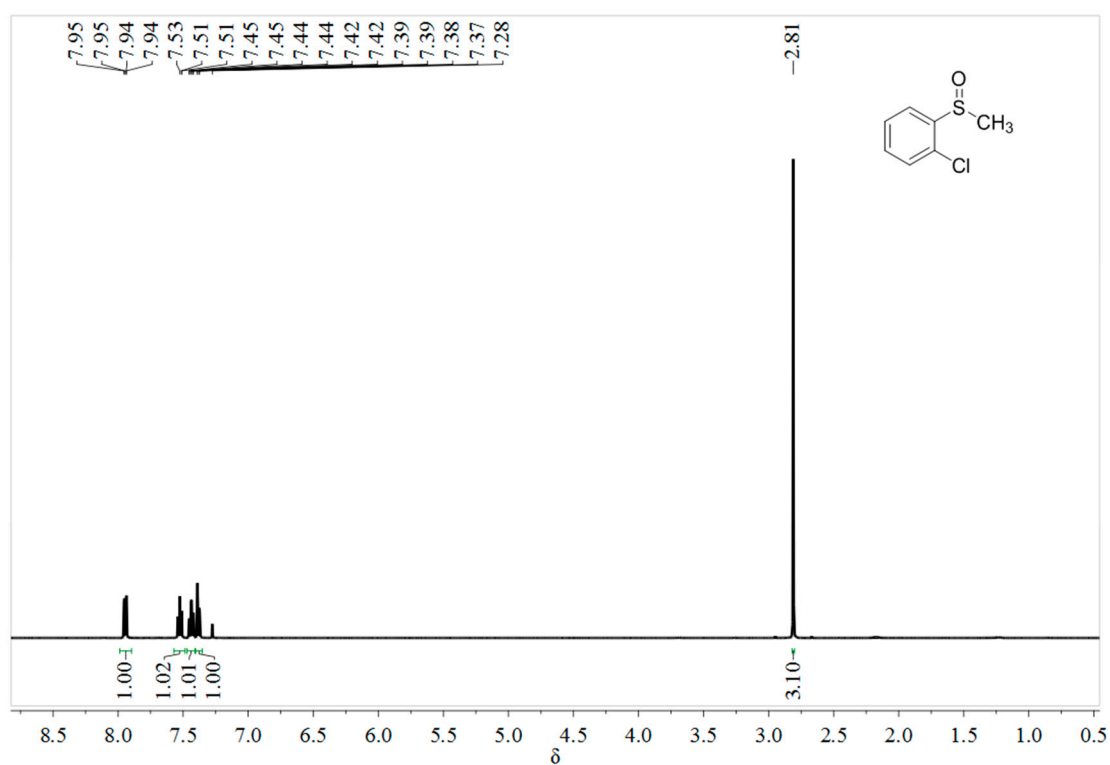

**Figure S4.** <sup>1</sup>H-NMR spectrum of methyl (2-chlorophenyl) sulfoxide.

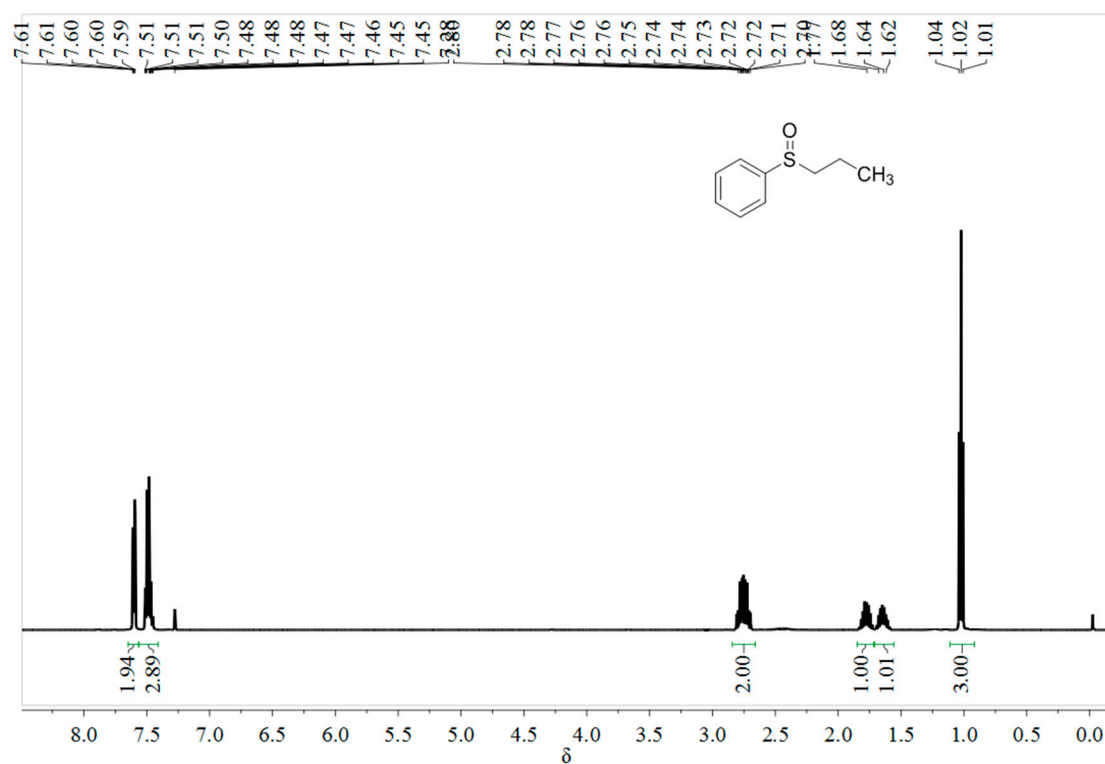

**Figure S5.**  $^1\text{H}$ -NMR spectrum of *n*-propyl phenyl sulfoxide.

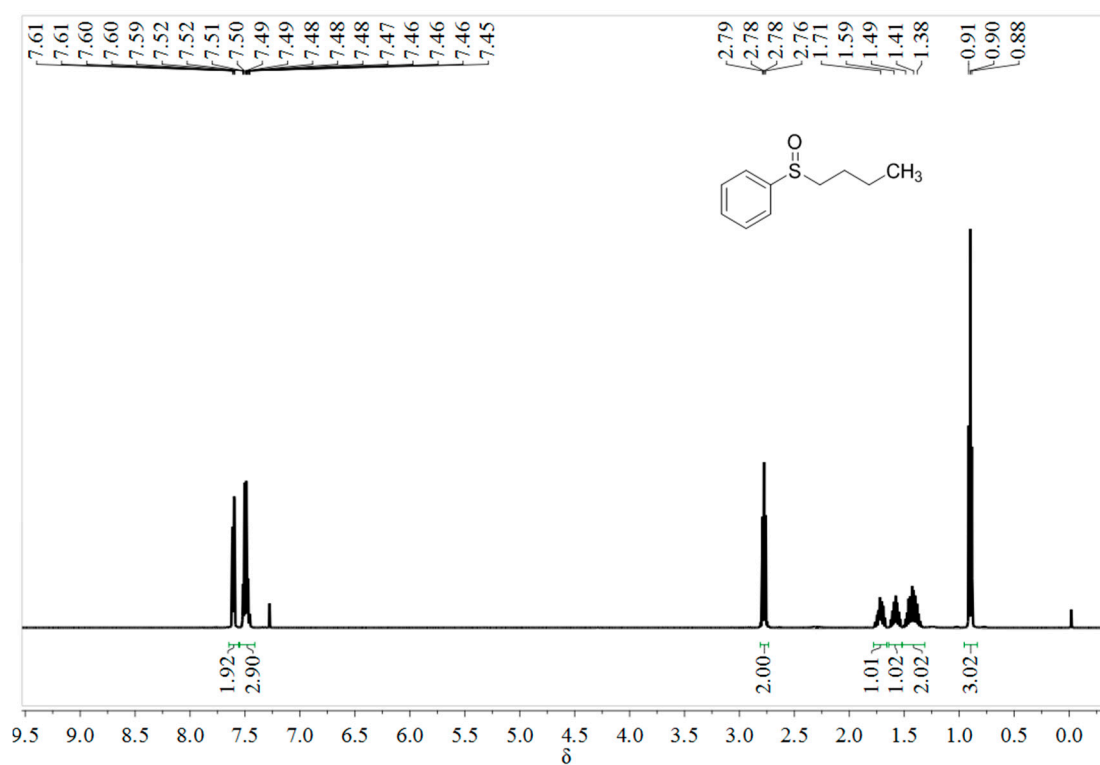

**Figure S6.**  $^1\text{H}$ -NMR spectrum of *n*-butyl phenyl sulfoxide.

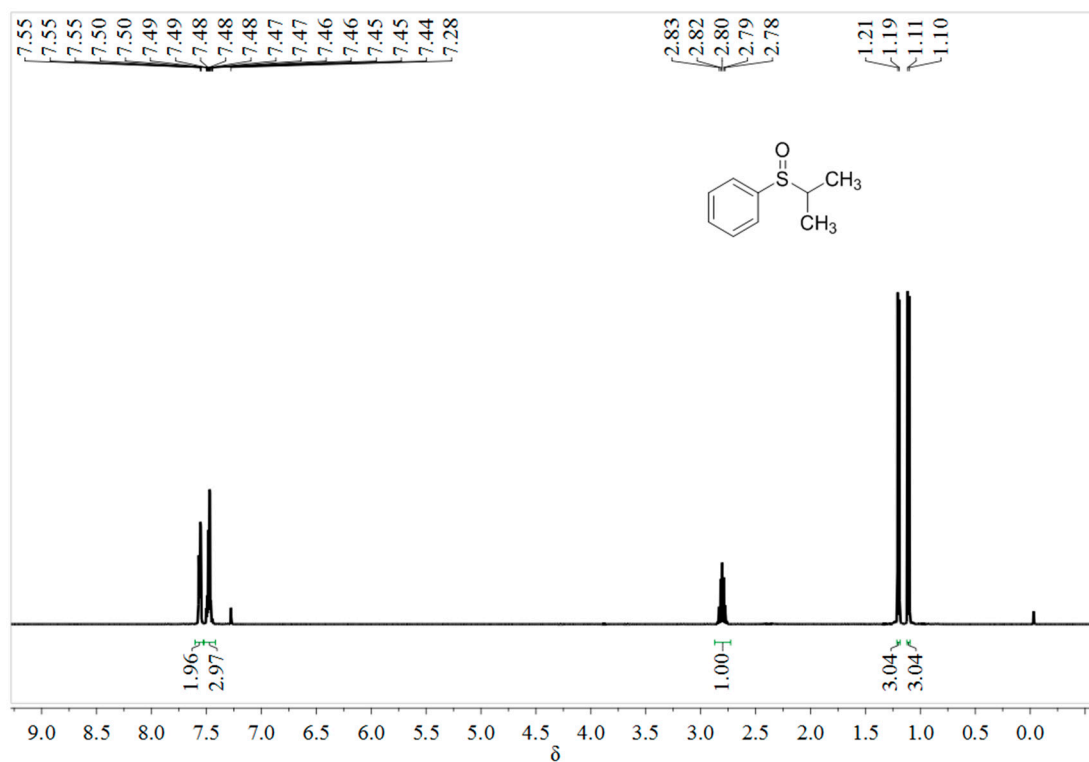

**Figure S7.** <sup>1</sup>H-NMR spectrum of isopropyl phenyl sulfoxide.

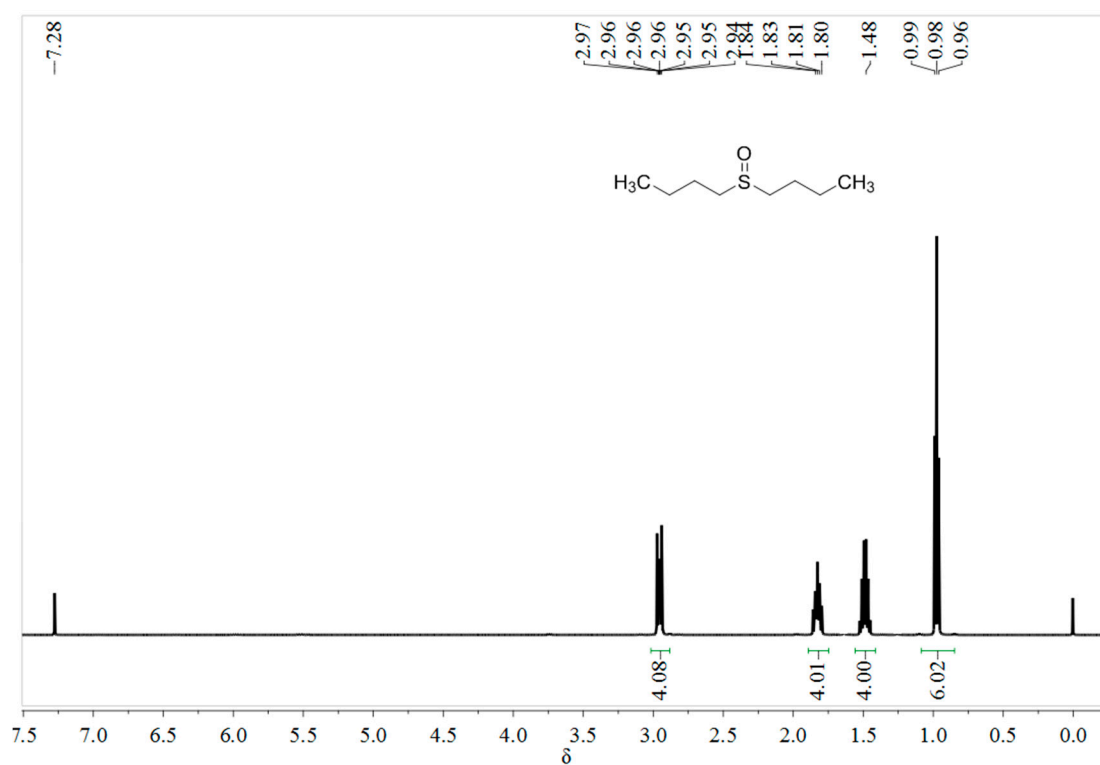

**Figure S8.** <sup>1</sup>H-NMR spectrum of *n*-butyl sulfoxide.

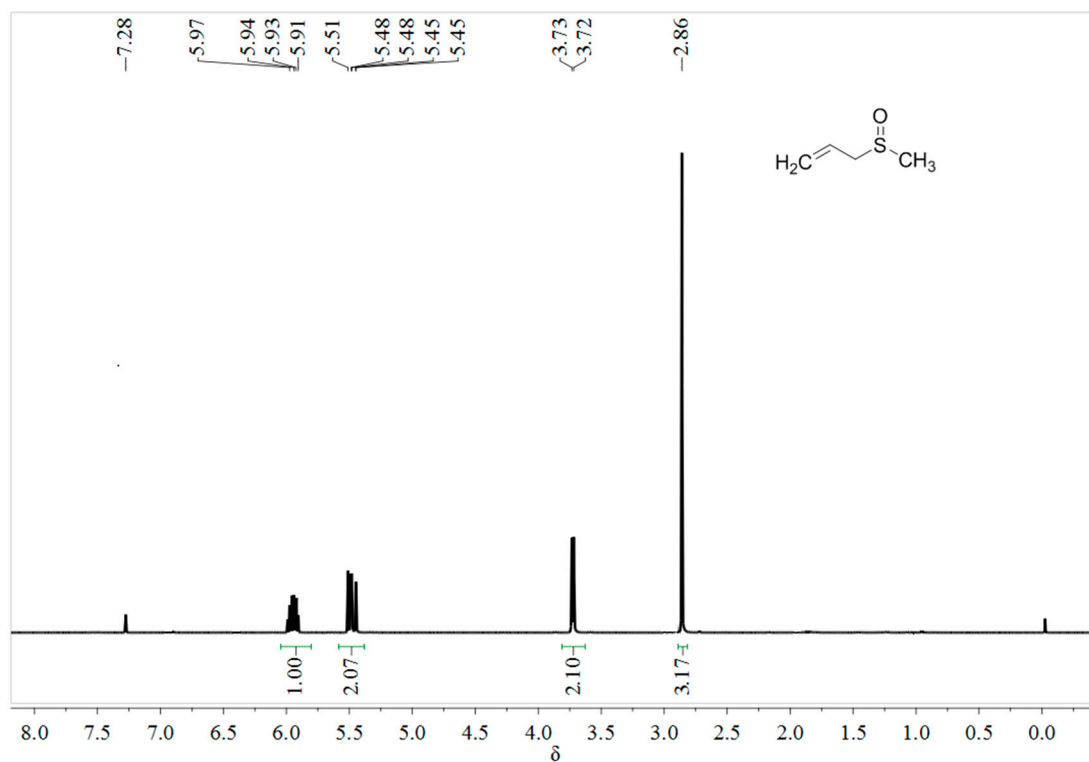

**Figure S9.** <sup>1</sup>H-NMR spectrum of allyl methyl sulfoxide.

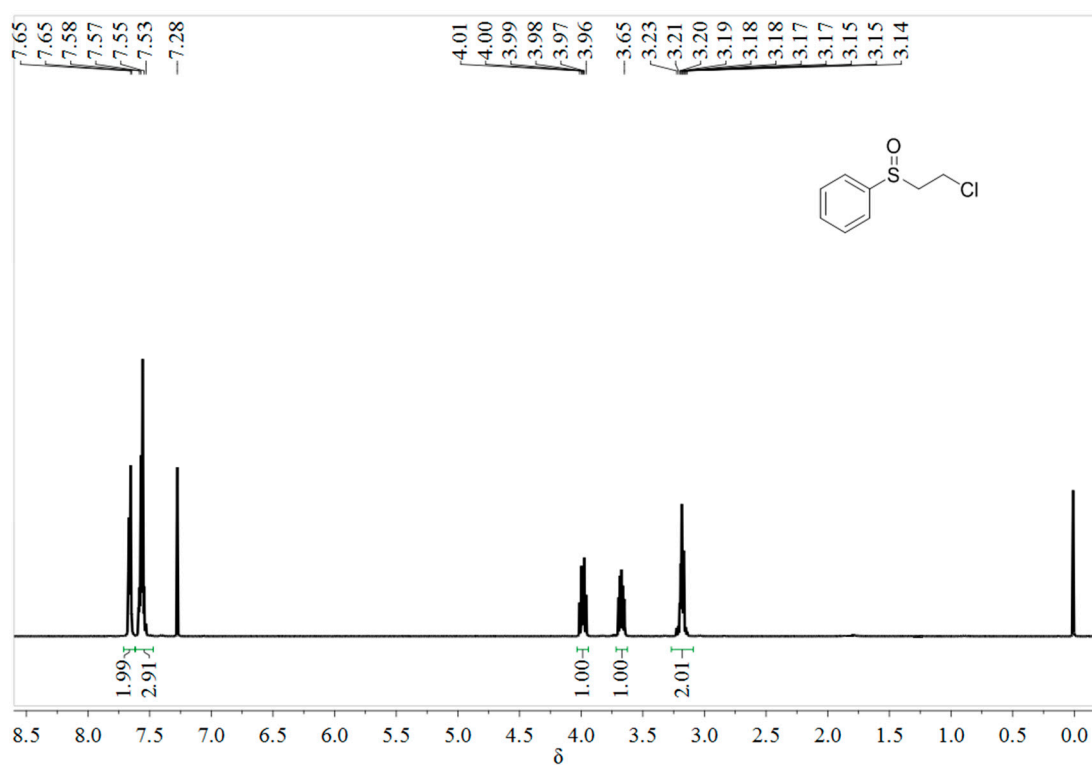

**Figure S10.** <sup>1</sup>H-NMR spectrum of 2-chloroethyl phenyl sulfoxide.

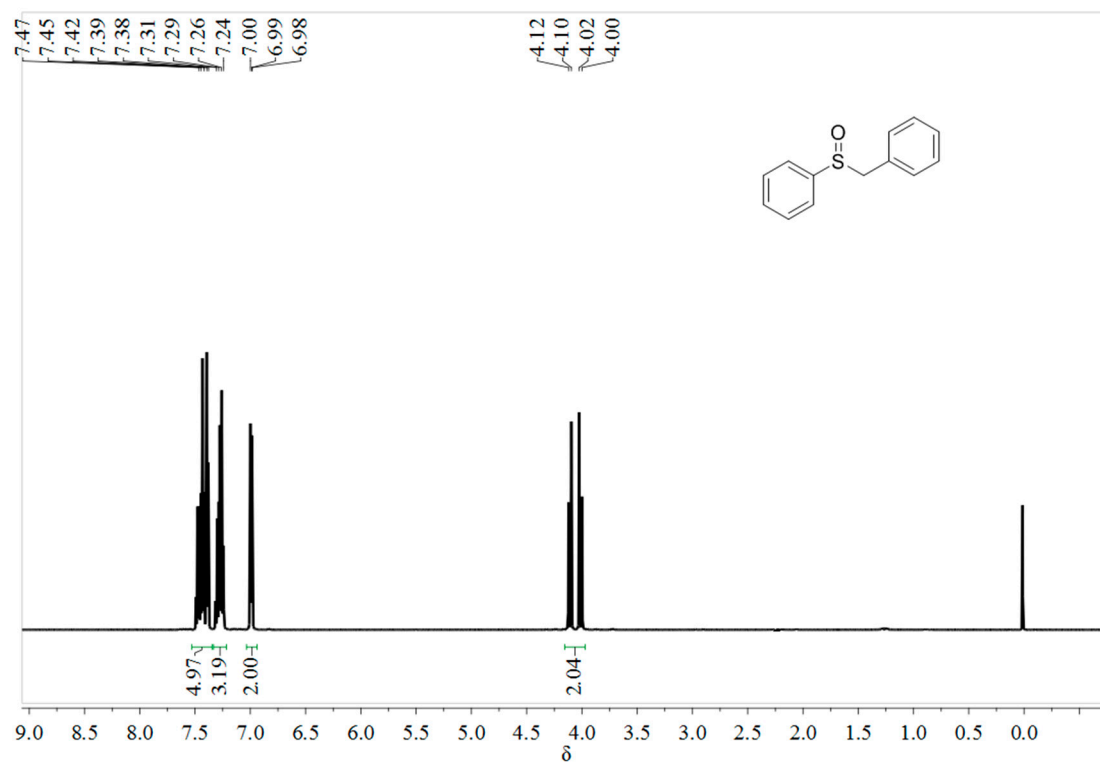

**Figure S11.** <sup>1</sup>H-NMR spectrum of benzyl phenyl sulfoxide.

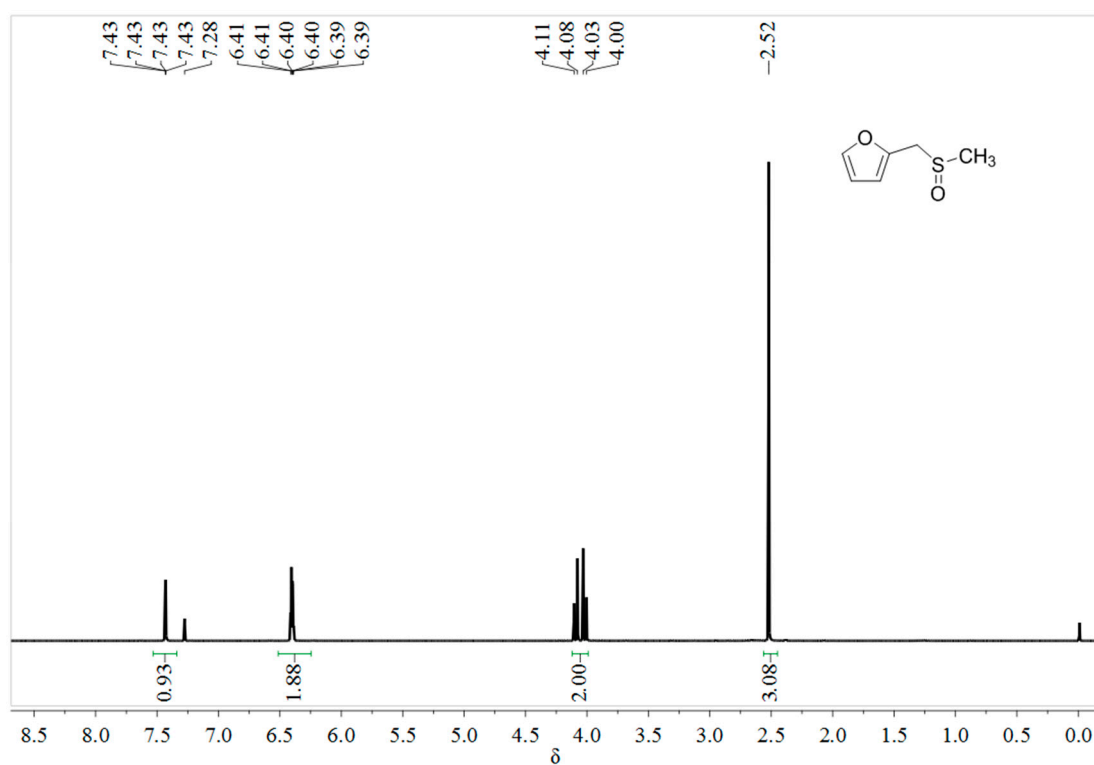

**Figure S12.** <sup>1</sup>H-NMR spectrum of furfuryl methyl sulfoxide.

### 3. $^{13}\text{C}$ -NMR Spectra of Product Sulfoxides

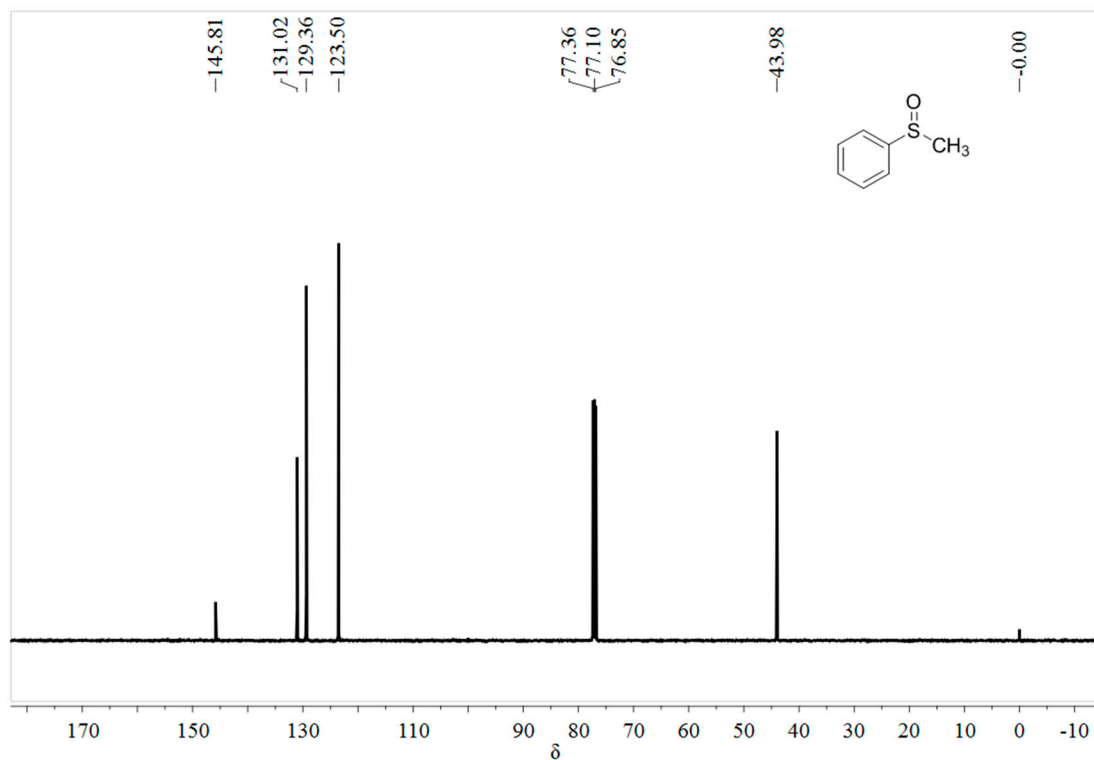

**Figure S13.**  $^{13}\text{C}$ -NMR spectrum of methyl phenyl sulfoxide.

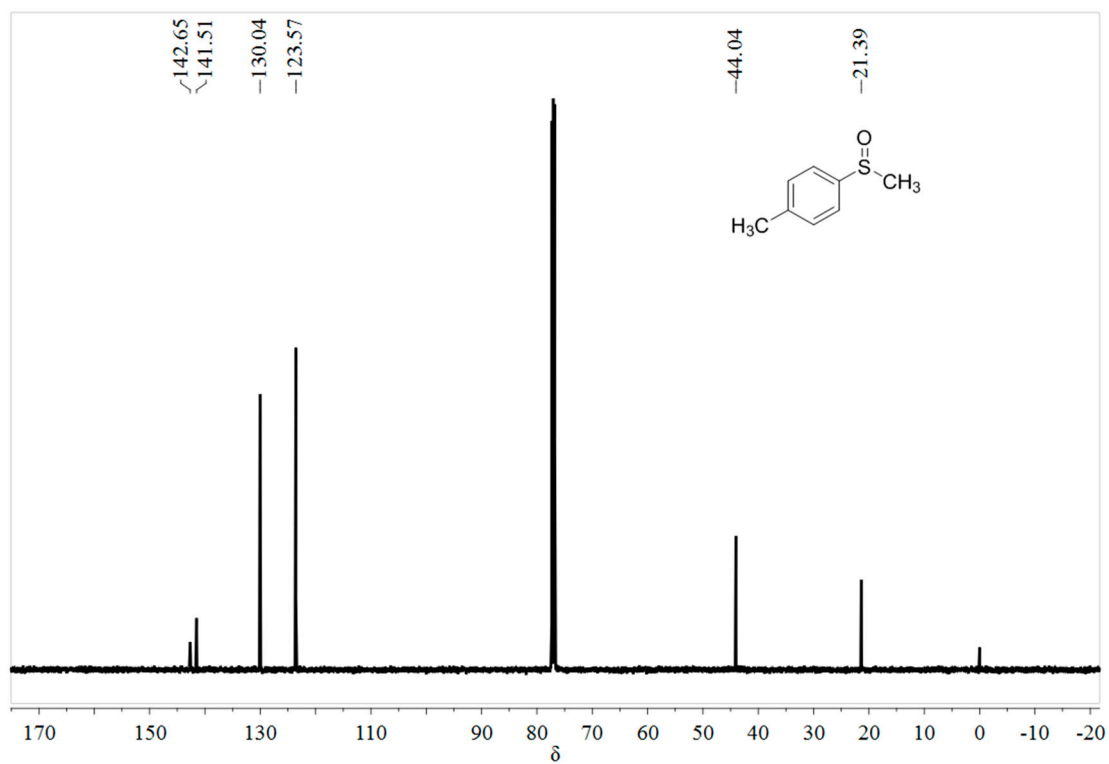

**Figure S14.**  $^{13}\text{C}$ -NMR spectrum of methyl (4-methylphenyl) sulfoxide.



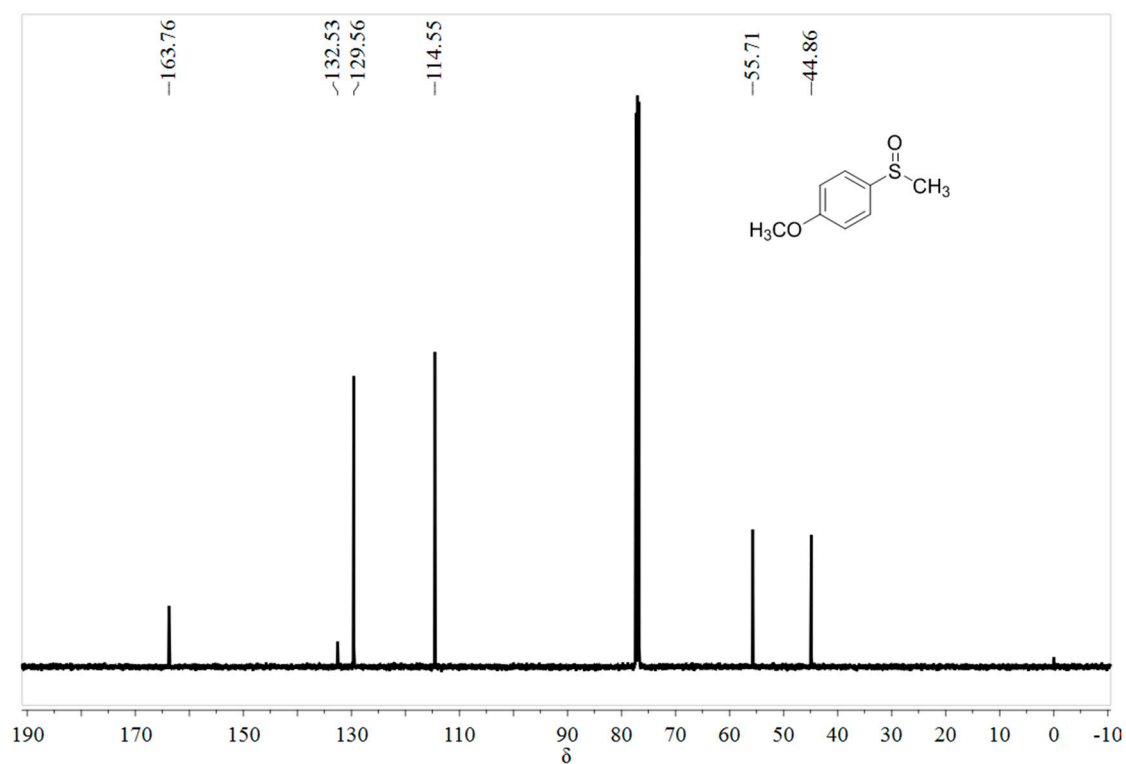

**Figure S15.** <sup>13</sup>C-NMR spectrum of methyl (4-methoxyphenyl) sulfoxide.

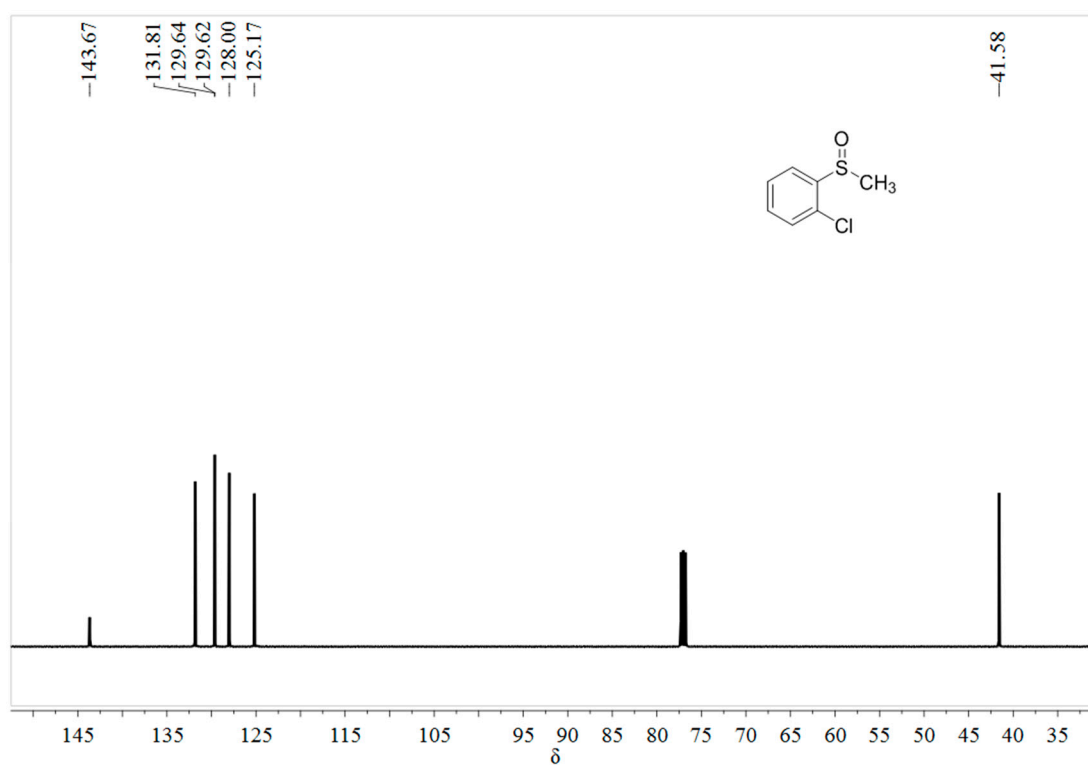

**Figure S16.** <sup>13</sup>C-NMR spectrum of methyl (2-chlorophenyl) sulfoxide.

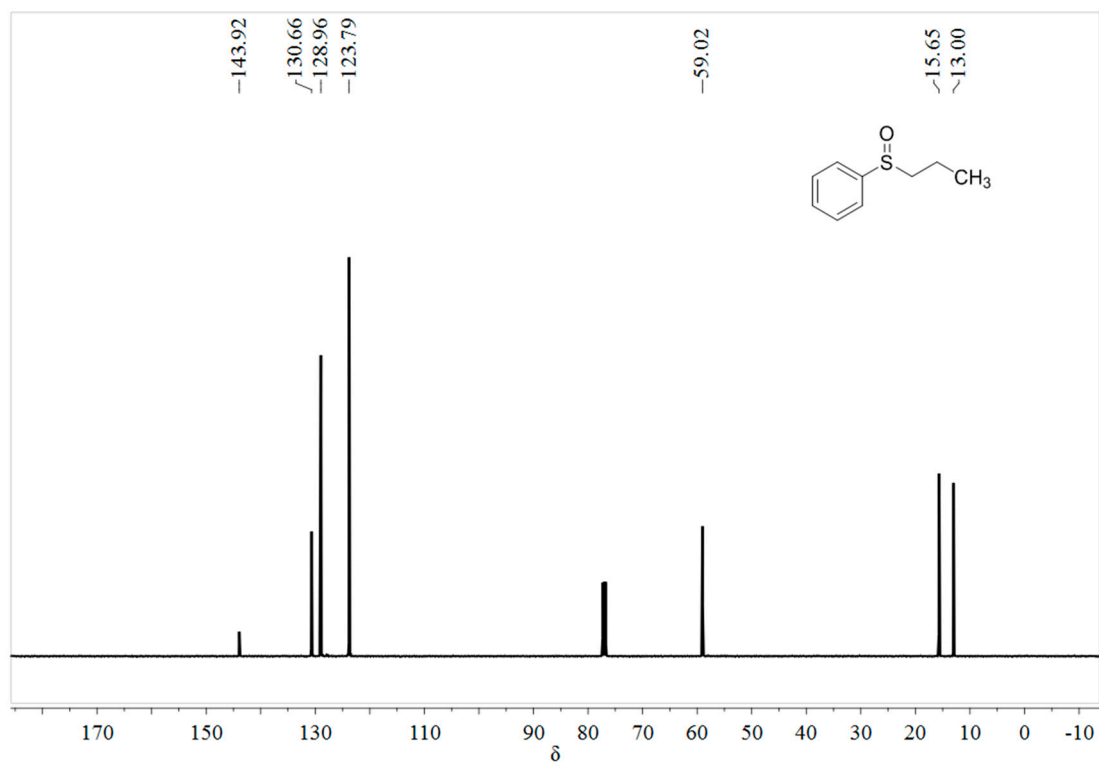

**Figure S17.** <sup>13</sup>C-NMR spectrum of *n*-propyl phenyl sulfoxide.

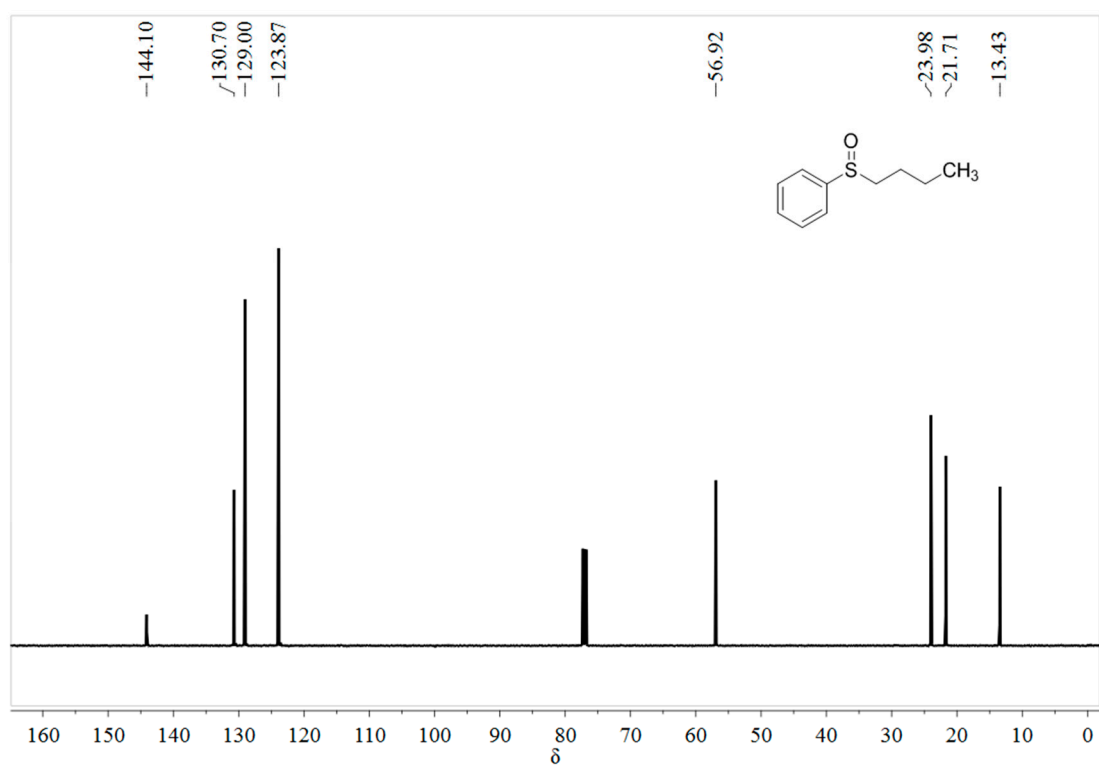

**Figure S18.** <sup>13</sup>C-NMR spectrum of *n*-butyl phenyl sulfoxide.

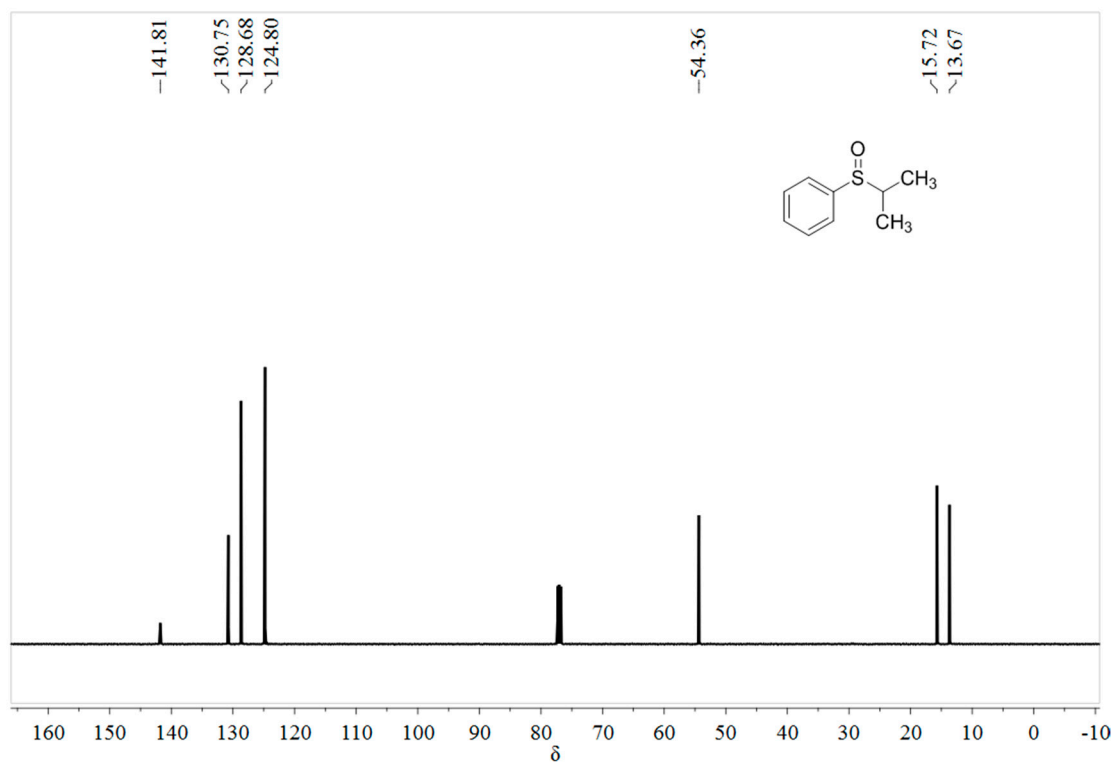

**Figure S19.** <sup>13</sup>C-NMR spectrum of isopropyl phenyl sulfoxide.

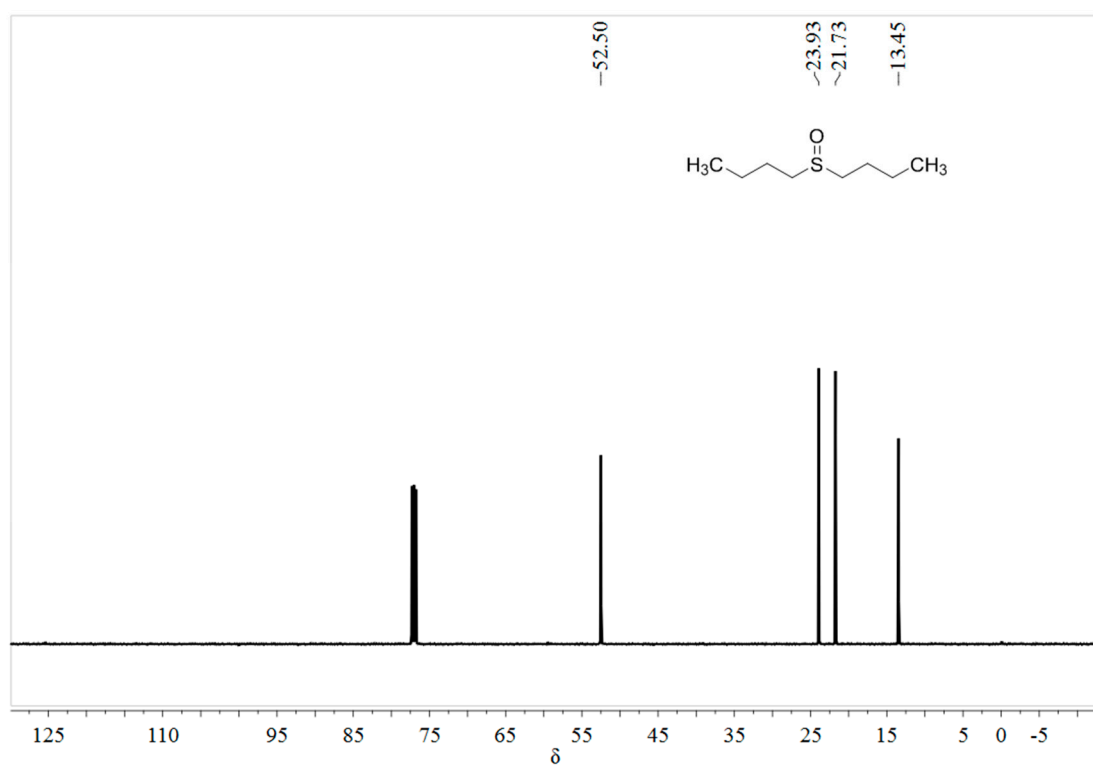

**Figure S20.** <sup>13</sup>C-NMR spectrum of *n*-butyl sulfoxide.

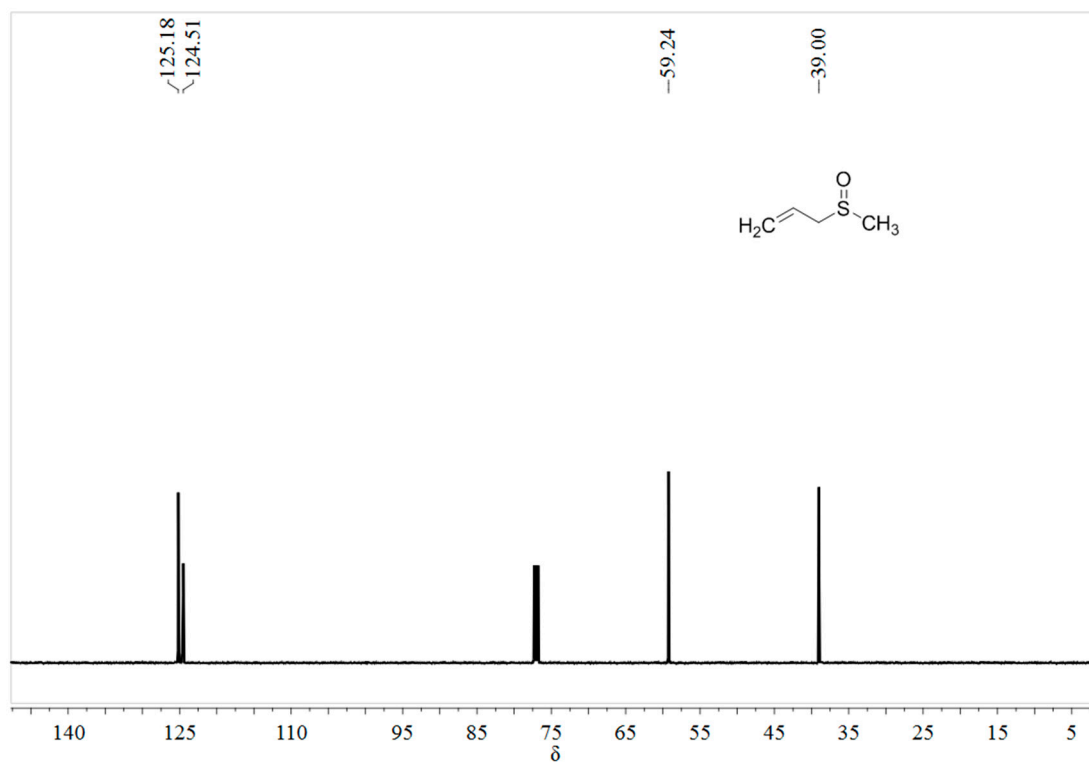

**Figure S21.** <sup>13</sup>C-NMR spectrum of allyl methyl sulfoxide.

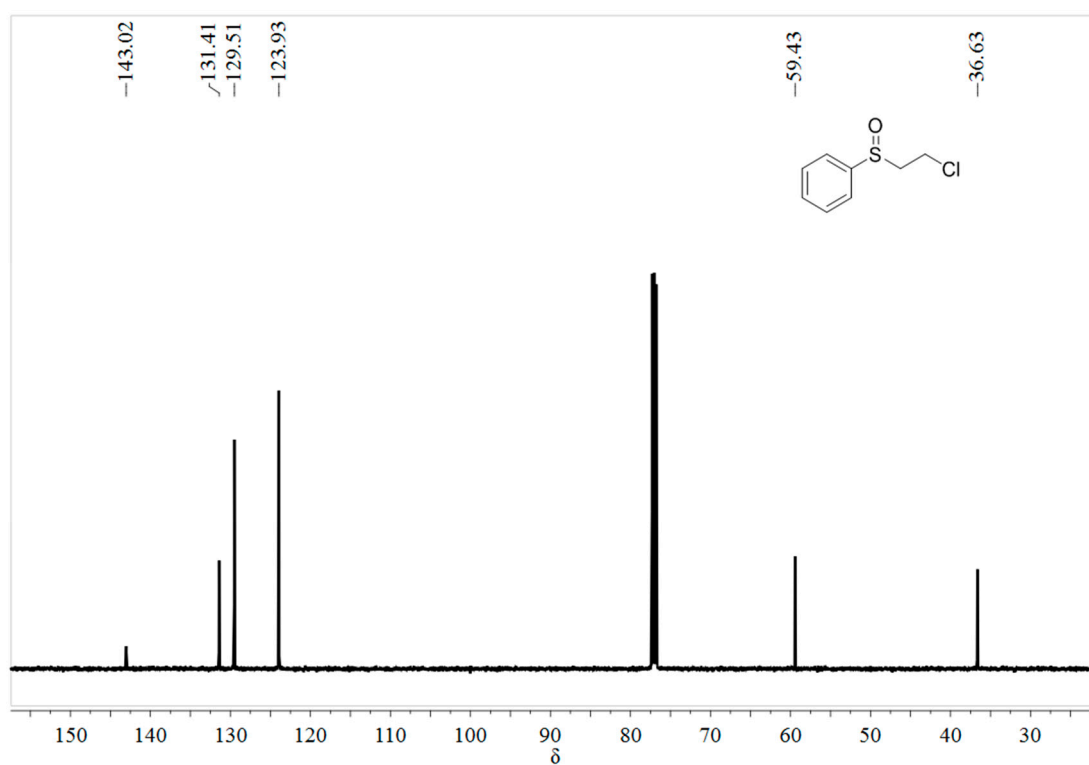

**Figure S22.** <sup>13</sup>C-NMR spectrum of 2-chloroethyl phenyl sulfoxide.

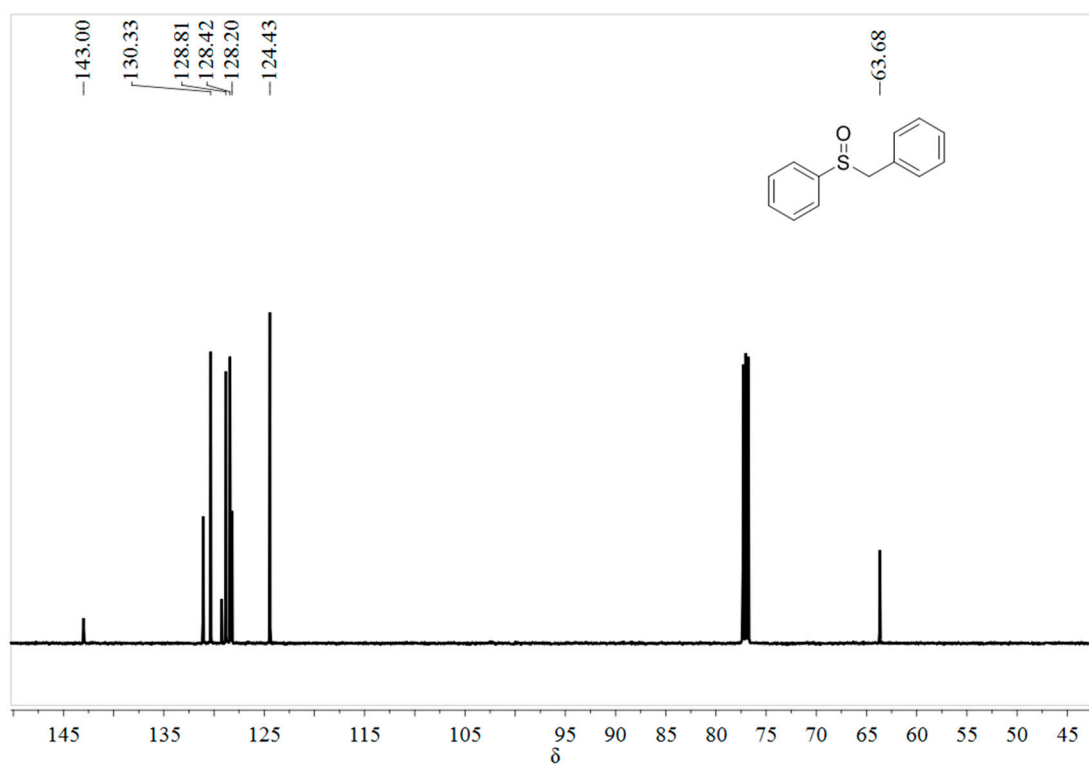

**Figure S23.** <sup>13</sup>C-NMR spectrum of benzyl phenyl sulfoxide.

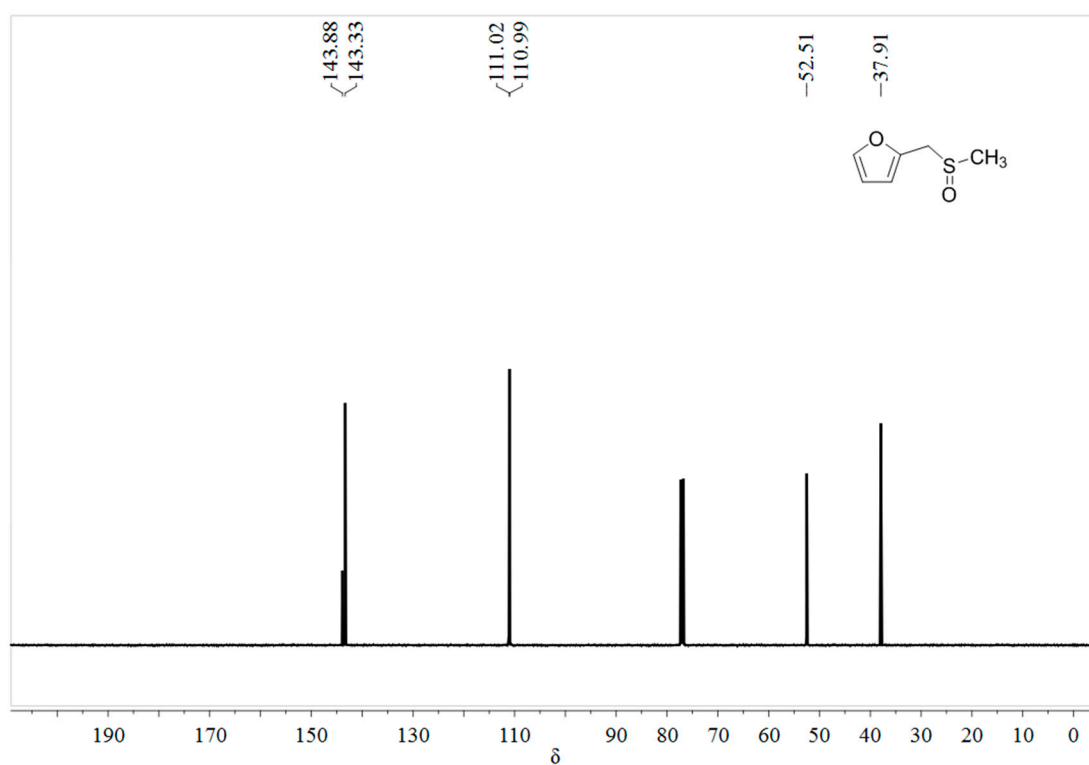

**Figure S24.** <sup>13</sup>C-NMR spectrum of furfuryl methyl sulfoxide.

## 4. NMR Data of Product Sulfoxides

Table S22. NMR Data of Product Sulfoxides.

| No. | Molecule Structures                                                                 | <sup>1</sup> H- Data                                                                                                                                                           | <sup>13</sup> C- Data                                                                                                 |
|-----|-------------------------------------------------------------------------------------|--------------------------------------------------------------------------------------------------------------------------------------------------------------------------------|-----------------------------------------------------------------------------------------------------------------------|
| 1   | 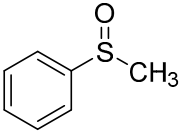   | <sup>1</sup> H-NMR (400 MHz, CDCl <sub>3</sub> ): δ = 7.65 (d, 2H), 7.54–7.49 (m, 3H), 2.73 ppm (s, 3H)                                                                        | <sup>13</sup> C-NMR (400 MHz, CDCl <sub>3</sub> ): δ = 145.81, 131.02, 129.36, 123.50, 43.98 ppm                      |
| 2   |    | <sup>1</sup> H-NMR (400MHz, CDCl <sub>3</sub> ): δ = 7.55 (d, 2H), 7.34 (d, 2H), 2.71 (s, 3H), 2.42 ppm (s, 3H)                                                                | <sup>13</sup> C-NMR (400 MHz, CDCl <sub>3</sub> ): δ = 142.65, 141.51, 130.04, 123.57, 44.04, 21.39 ppm               |
| 3   |    | <sup>1</sup> H-NMR (400 MHz, CDCl <sub>3</sub> ): δ = 7.90 (d, 2H), 7.05 (d, 2H), 3.90 (s, 3H), 3.05 ppm (s, 3H)                                                               | <sup>13</sup> C-NMR (400 MHz, CDCl <sub>3</sub> ): δ = 163.76, 132.53, 129.56, 114.55, 55.71, 44.86 ppm               |
| 4   |   | <sup>1</sup> H-NMR (400 MHz, CDCl <sub>3</sub> ): δ = 7.95 (d, 1H), 7.51 (t, 1H), 7.45 (t, 1H), 7.39 (d, 1H), 2.81 ppm (s, 3H)                                                 | <sup>13</sup> C-NMR (400 MHz, CDCl <sub>3</sub> ): δ = 143.67, 131.81, 129.64, 129.62, 128.00, 125.17, 41.58 ppm      |
| 5   |  | <sup>1</sup> H-NMR (400 MHz, CDCl <sub>3</sub> ): δ = 7.61 (d, 2H), 7.51–7.45 (m, 3H), 2.78–2.70 (m, 2H), 1.77–1.62 (m, 2H), 1.02 ppm (t, 3H)                                  | <sup>13</sup> C-NMR (400 MHz, CDCl <sub>3</sub> ): δ = 143.92, 130.66, 128.96, 123.79, 59.02, 15.65, 13.00 ppm        |
| 6   |  | <sup>1</sup> H-NMR (400 MHz, CDCl <sub>3</sub> ): δ = 7.61 (d, 2H), 7.52–7.45 (m, 3H), 2.78 (t, 2H), 1.76–1.68 (m, 1H), 1.62–1.54 (m, 1H), 1.50–1.34 (m, 2H), 0.90 ppm (t, 3H) | <sup>13</sup> C-NMR (400 MHz, CDCl <sub>3</sub> ): δ = 144.10, 130.70, 129.00, 123.87, 56.92, 23.98, 21.71, 13.43 ppm |
| 7   |  | <sup>1</sup> H-NMR (400 MHz, CDCl <sub>3</sub> ): δ = 7.55 (d, 2H), 7.50–7.44 (m, 3H), 2.83–2.78 (m, 1H), 1.21 (d, 3H), 1.11 ppm (d, 3H)                                       | <sup>13</sup> C-NMR (400 MHz, CDCl <sub>3</sub> ): δ = 141.81, 130.75, 128.68, 124.80, 54.36, 15.72, 13.67 ppm        |
| 8   |  | <sup>1</sup> H-NMR (400 MHz, CDCl <sub>3</sub> ): δ = 2.97–2.94 (m, 4H), 1.86–1.80 (m, 4H), 1.52–1.45 (m, 4H), 0.98 ppm (t, 6H)                                                | <sup>13</sup> C-NMR (400 MHz, CDCl <sub>3</sub> ): δ = 52.50, 23.93, 21.73, 13.45 ppm                                 |
| 9   |  | <sup>1</sup> H-NMR (400 MHz, CDCl <sub>3</sub> ): δ = 5.97–5.91 (m, 1H), 5.51–5.45 (m, 2H), 3.73 (d, 2H), 2.86 ppm (s, 3H)                                                     | <sup>13</sup> C-NMR (400 MHz, CDCl <sub>3</sub> ): δ = 125.18, 124.51, 59.24, 39.00 ppm                               |

Table S22. *Cont.*

| No. | Molecule Structures                                                               | <sup>1</sup> H- Data                                                                                                                                       | <sup>13</sup> C- Data                                                                                                               |
|-----|-----------------------------------------------------------------------------------|------------------------------------------------------------------------------------------------------------------------------------------------------------|-------------------------------------------------------------------------------------------------------------------------------------|
| 10  | 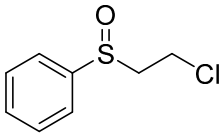 | <sup>1</sup> H-NMR (400 MHz, CDCl <sub>3</sub> ):<br>δ = 7.67–7.65 (m, 2H), 7.59–7.53 (m, 3H), 4.01–3.96 (m, 1H), 3.70–3.65 (m, 1H), 3.23–3.14 ppm (m, 2H) | <sup>13</sup> C-NMR (400 MHz, CDCl <sub>3</sub> ):<br>δ = 143.02, 131.41, 129.51, 123.93, 59.43, 36.63 ppm                          |
| 11  |  | <sup>1</sup> H-NMR (400 MHz, CDCl <sub>3</sub> ):<br>δ = 7.49–7.38 (m, 5H), 7.32–7.24 (m, 3H), 7.00 (d, 2H), 4.12–4.00 ppm (m, 2H)                         | <sup>13</sup> C-NMR (400 MHz, CDCl <sub>3</sub> ):<br>δ = 143.00, 131.09, 130.33, 129.24, 128.81, 128.42, 128.20, 124.43, 63.68 ppm |
| 12  |  | <sup>1</sup> H-NMR (400 MHz, CDCl <sub>3</sub> ): δ = 7.43 (s, 1H), 6.41–6.39 (m, 2H), 4.11–4.00 (m, 2H), 2.52 ppm (s, 3H)                                 | <sup>13</sup> C-NMR (400 MHz, CDCl <sub>3</sub> ):<br>δ = 143.88, 143.33, 111.02, 110.99, 52.51, 37.91 ppm                          |

## 5. ESI-MS Spectra of Product Sulfoxides

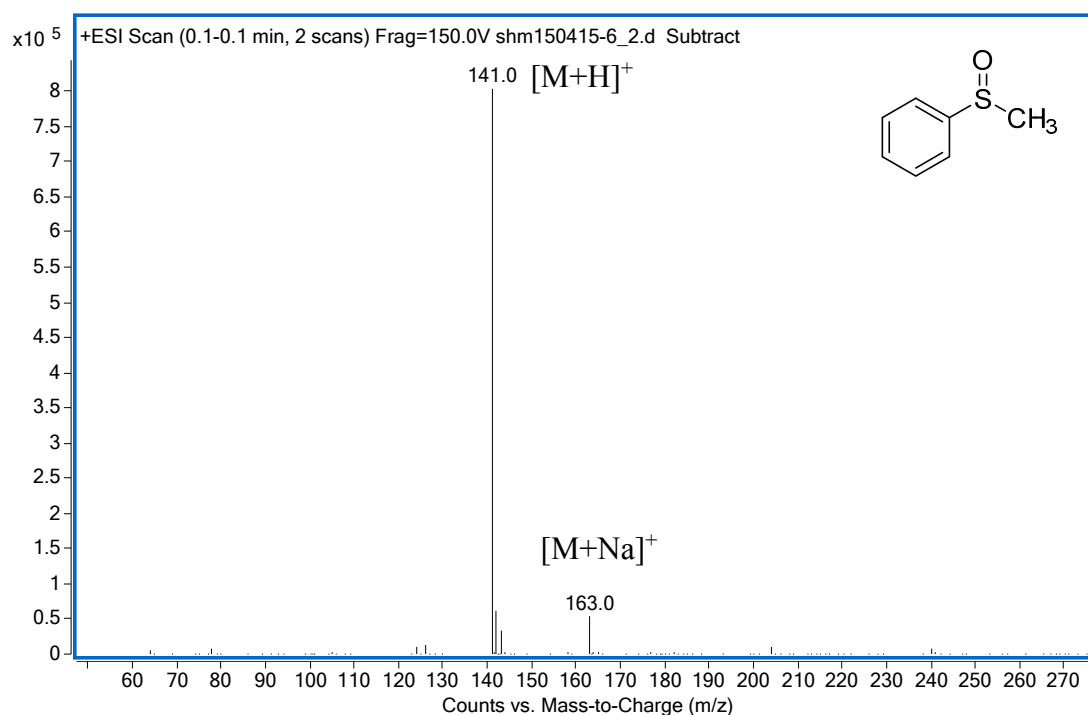

Figure S25. ESI-MS spectrum of methyl phenyl sulfoxide.

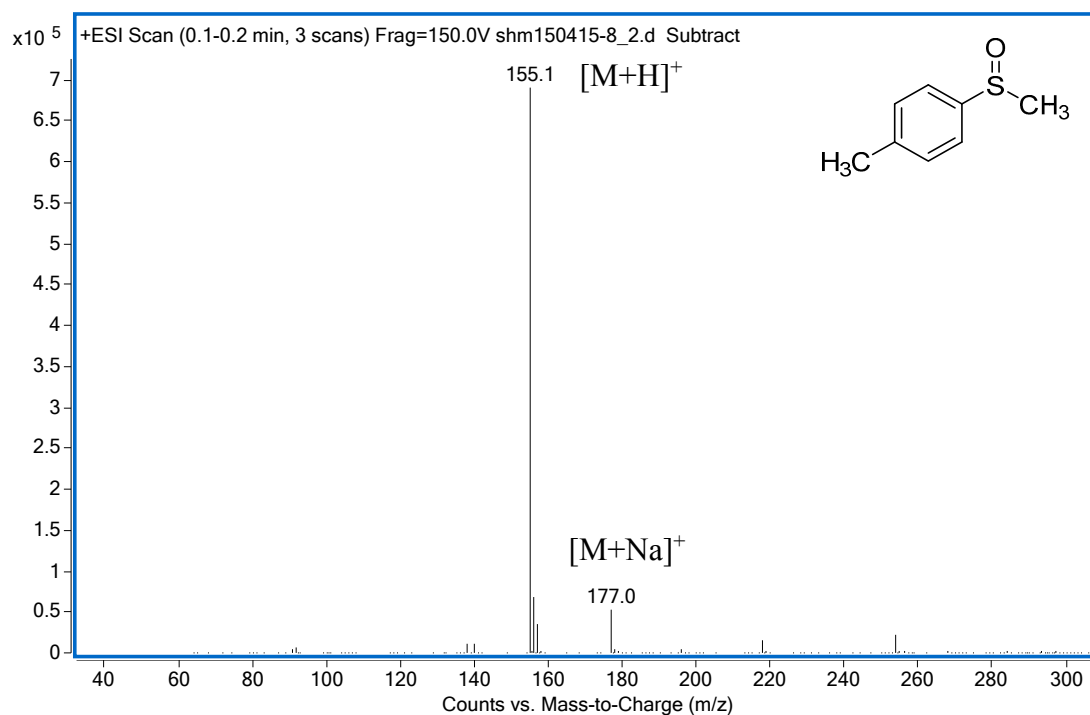

**Figure S26.** ESI-MS spectrum of methyl (4-methylphenyl) sulfoxide.

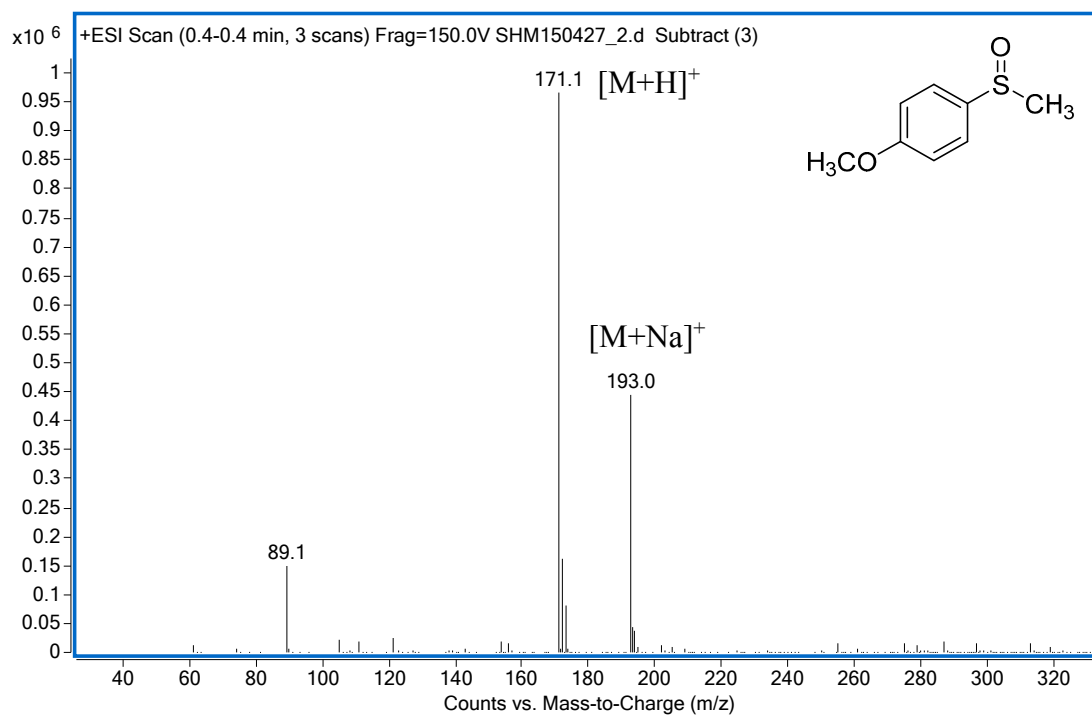

**Figure S27.** ESI-MS spectrum of methyl (4-methoxyphenyl) sulfoxide.



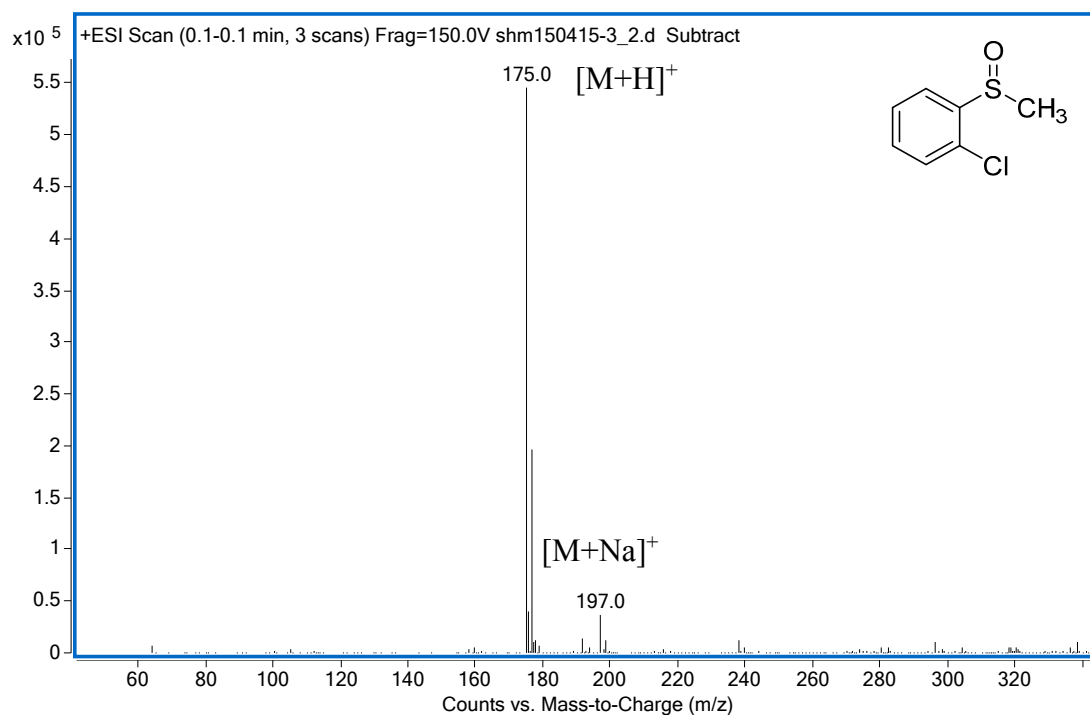

**Figure S28.** ESI-MS spectrum of methyl (2-chlorophenyl) sulfoxide.

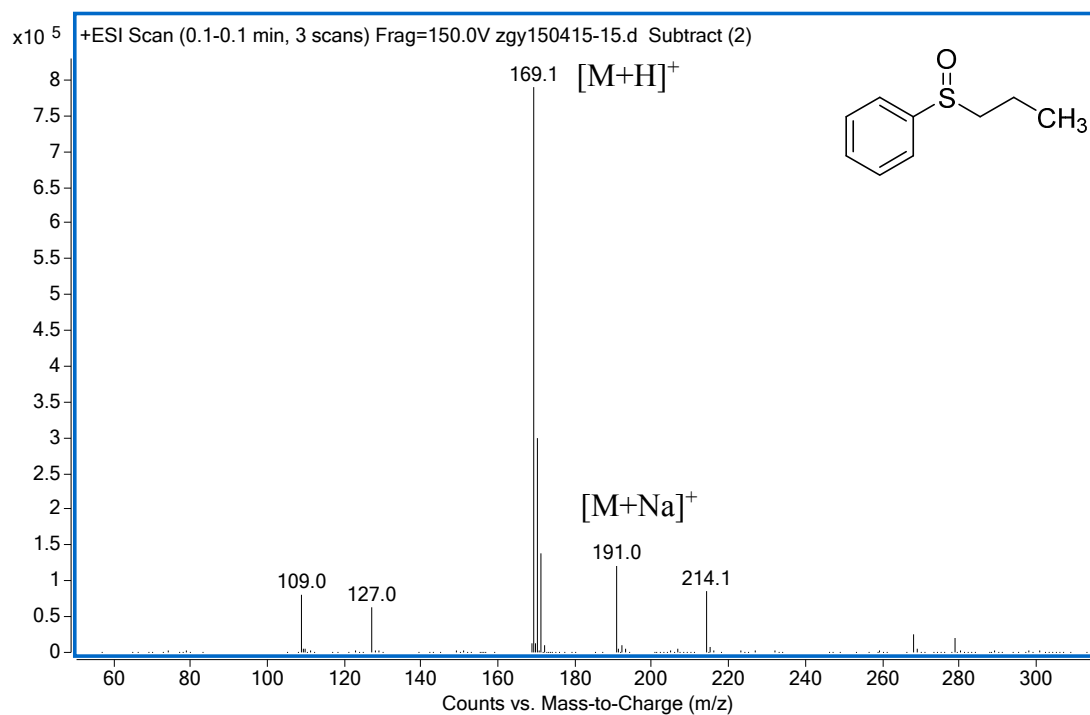

**Figure S29.** ESI-MS spectrum of *n*-propyl phenyl sulfoxide.

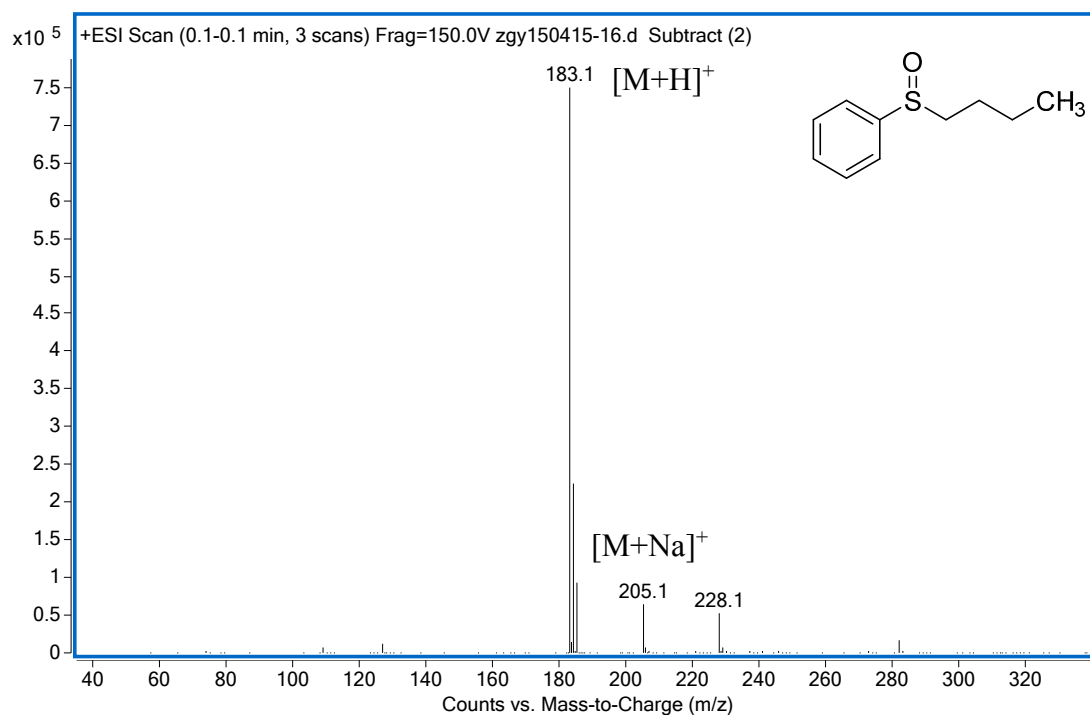

**Figure S30.** ESI-MS spectrum of *n*-butyl phenyl sulfoxide.

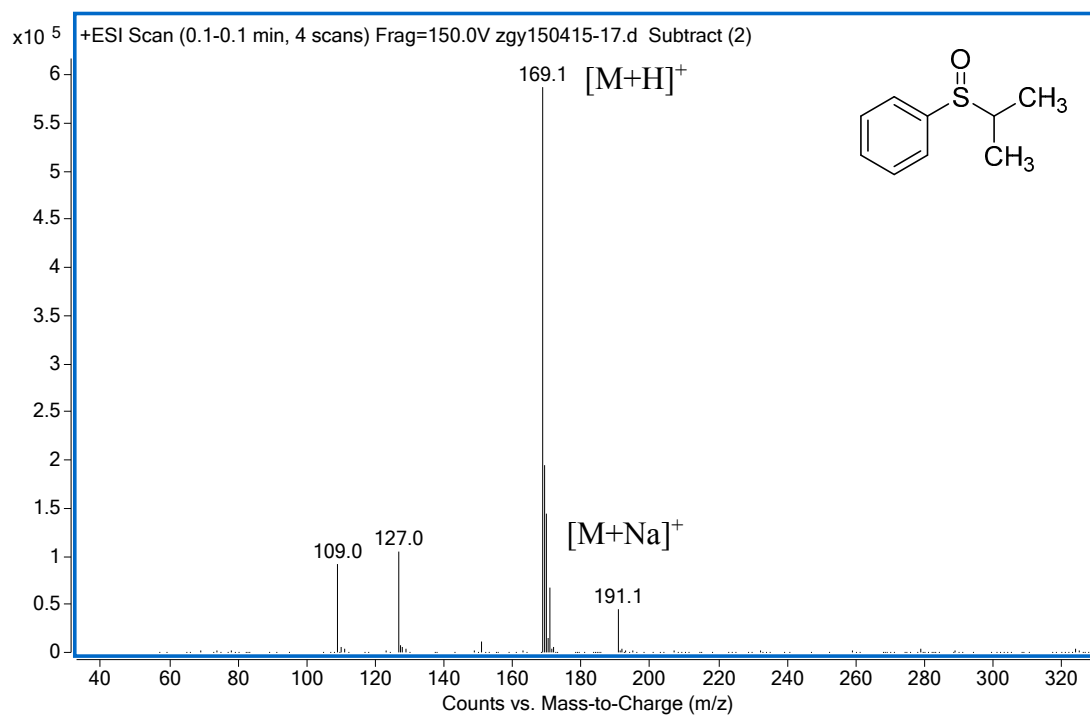

**Figure S31.** ESI-MS spectrum of isopropyl phenyl sulfoxide.

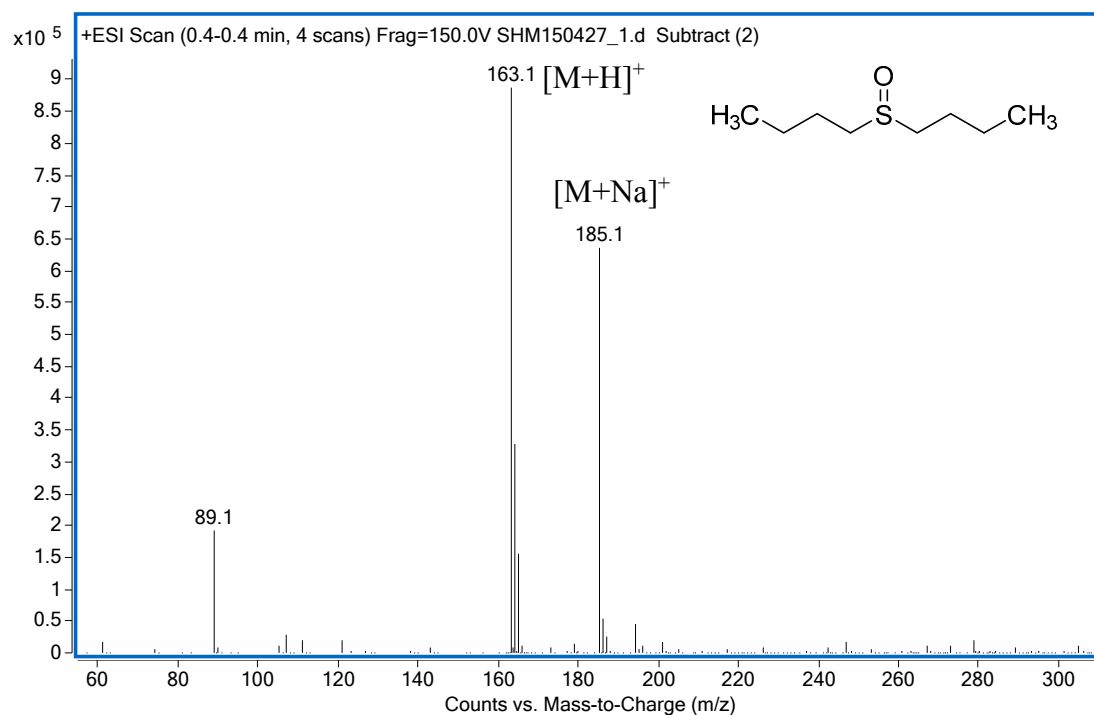

**Figure S32.** ESI-MS spectrum of *n*-butyl sulfoxide.

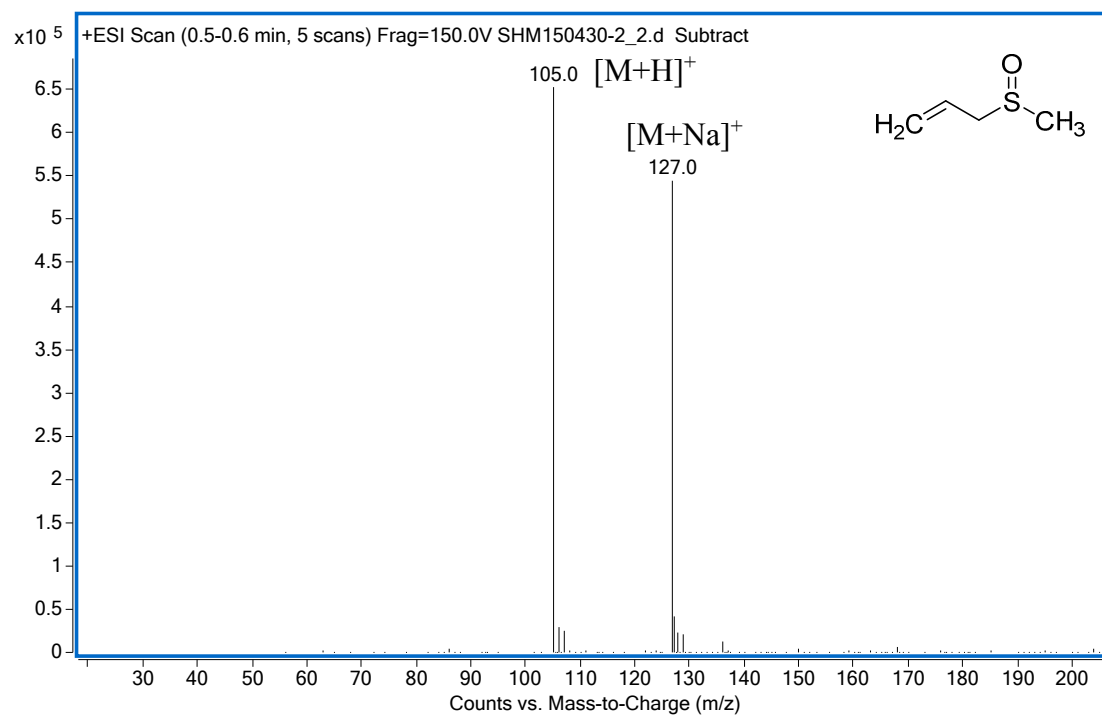

**Figure S33.** ESI-MS spectrum of allyl methyl sulfoxide.

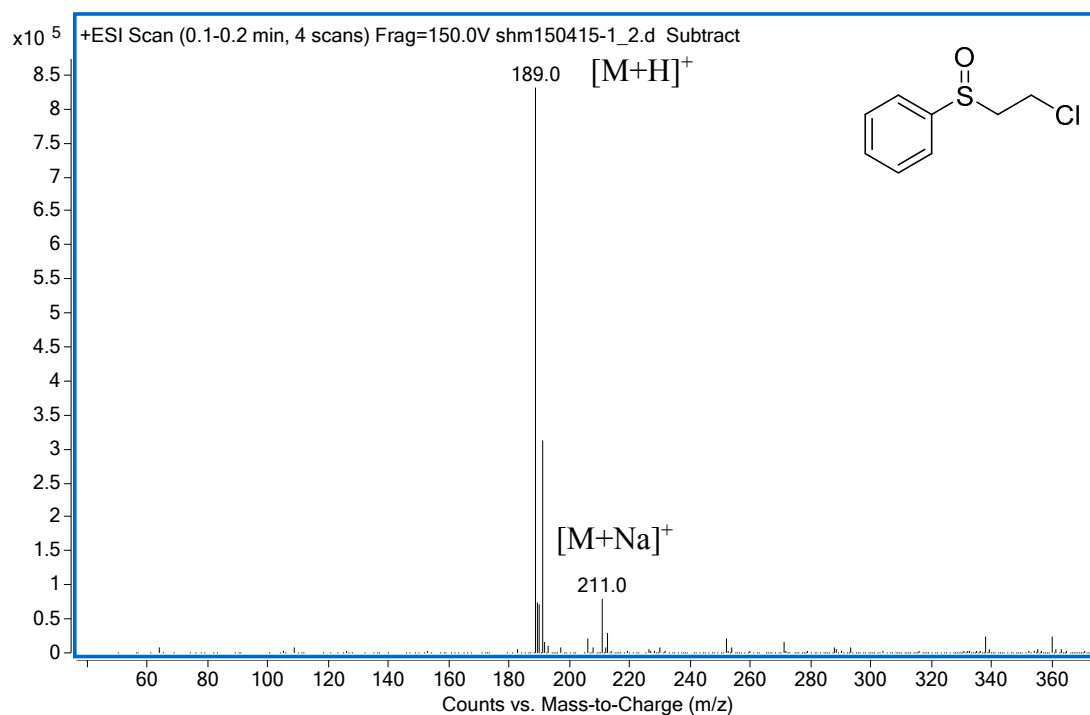

**Figure S34.** ESI-MS spectrum of 2-chloroethyl phenyl sulfoxide.

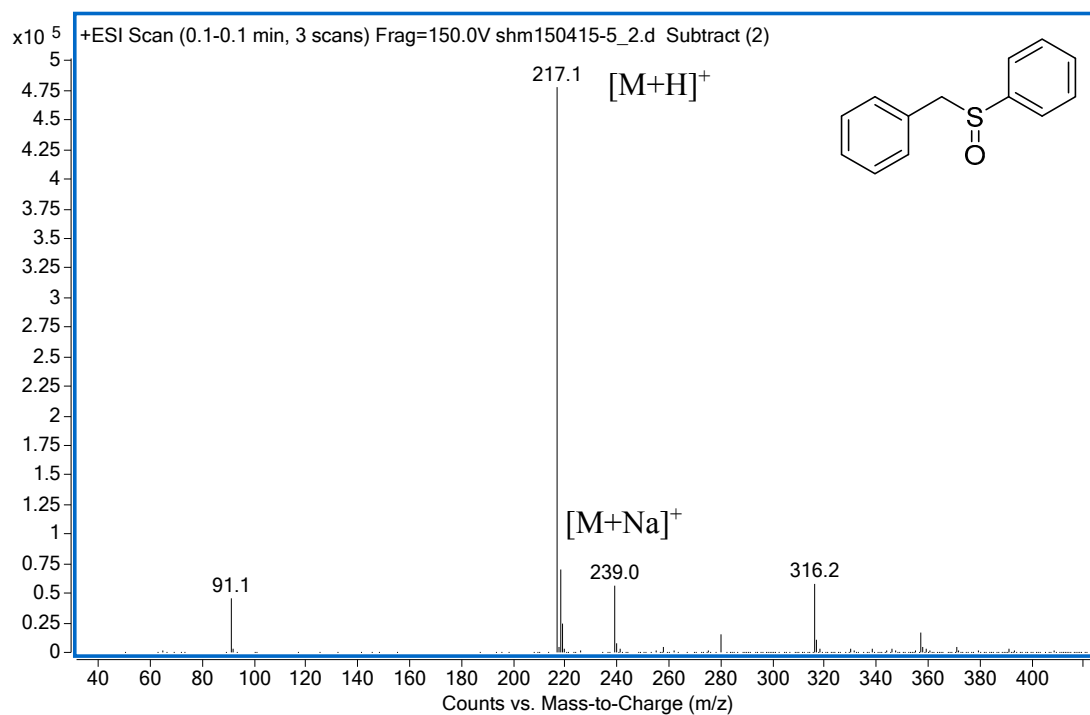

**Figure S35.** ESI-MS spectrum of benzyl phenyl sulfoxide.

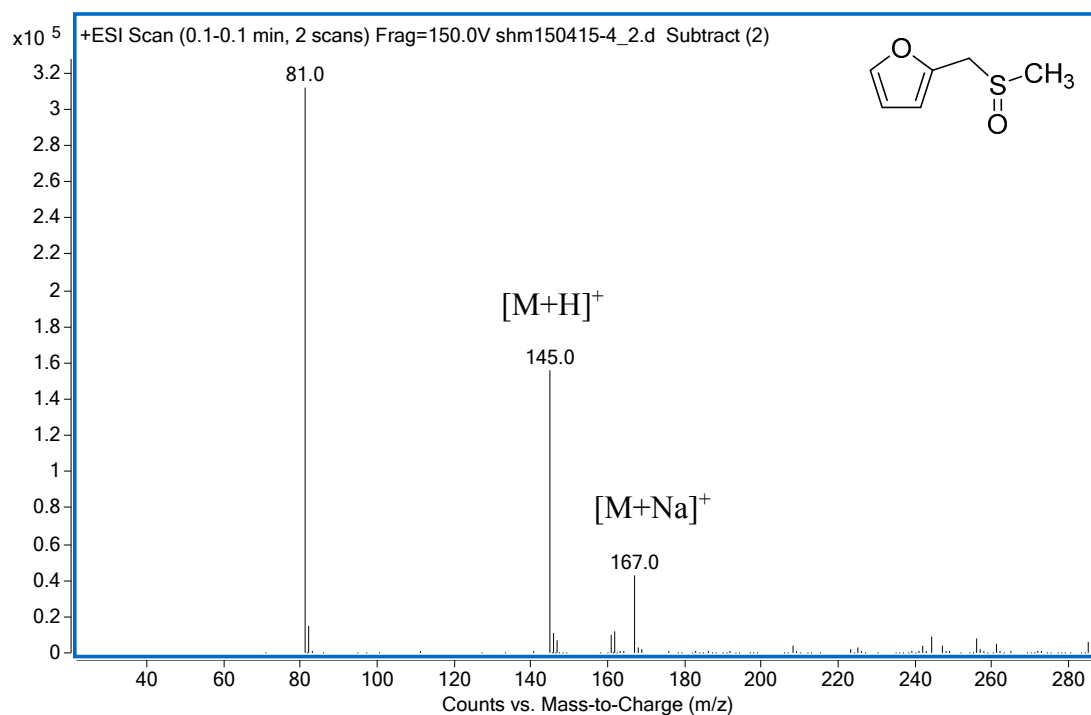

**Figure S36.** ESI-MS spectrum of furfuryl methyl sulfoxide.

## 6. Typical GC Spectra for the Product Sulfoxides

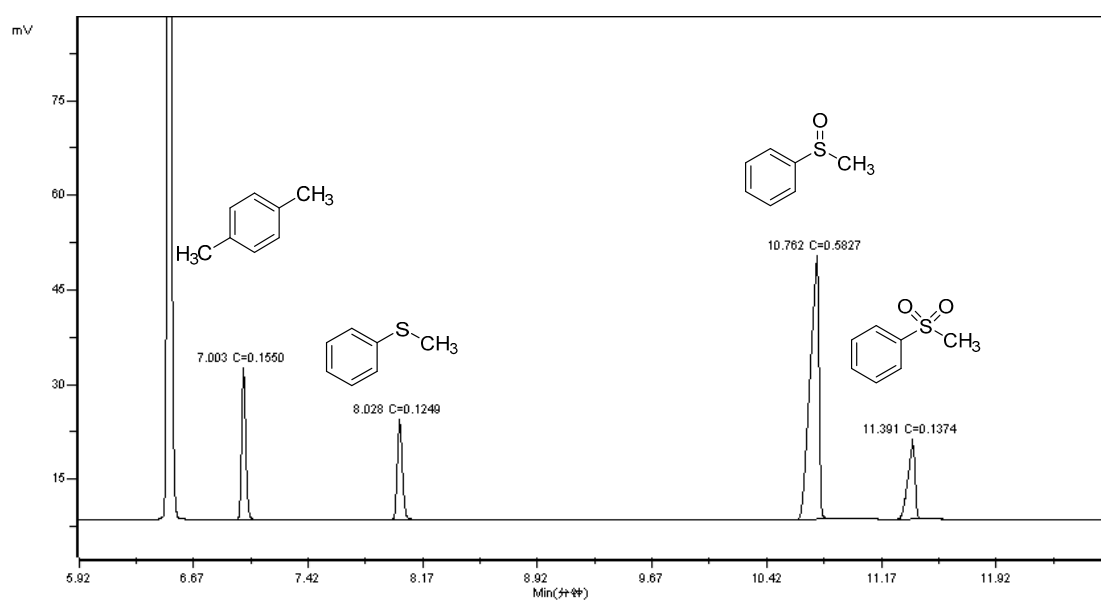

**Figure S37.** Typical qualitative spectrum.

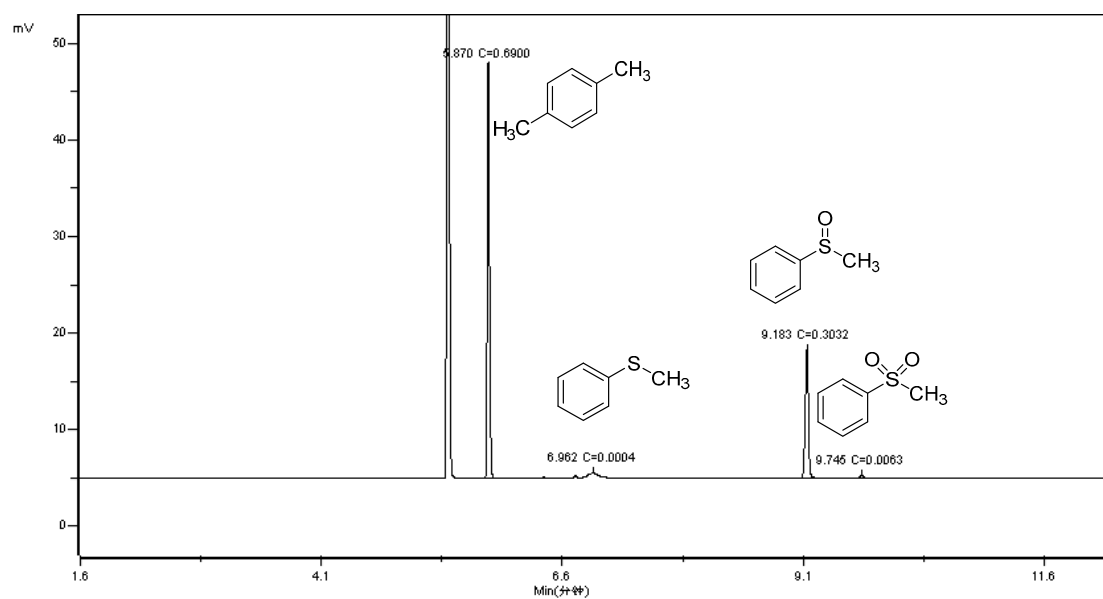

**Figure S38.** Typical quantitative spectrum.
